# Supplementary material for: Macronutrient digestion and polyphenol bioaccessibility in oat milk tea products: an in vitro gastrointestinal tract study
Source: Royal Society of Chemistry journal article supplement (doi:10.1039/d4fo01439a), 2024-01-01

**Fig. S1 TIC overlay diagram for QC sample mass spectrometry: (A) Negative ion mode; (B) Positive ion mode.**

**A**

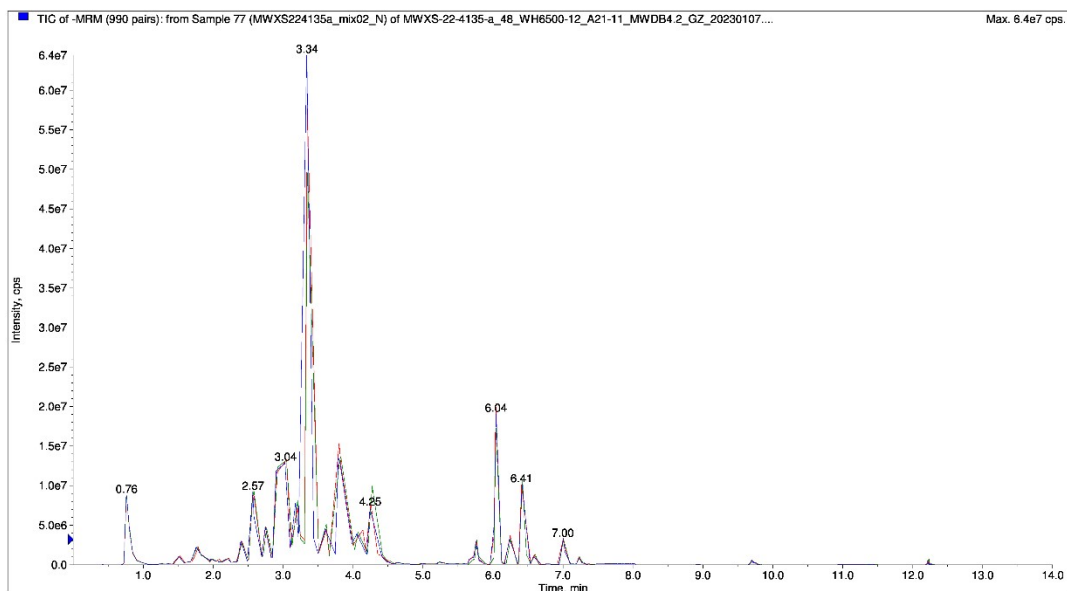

**B**

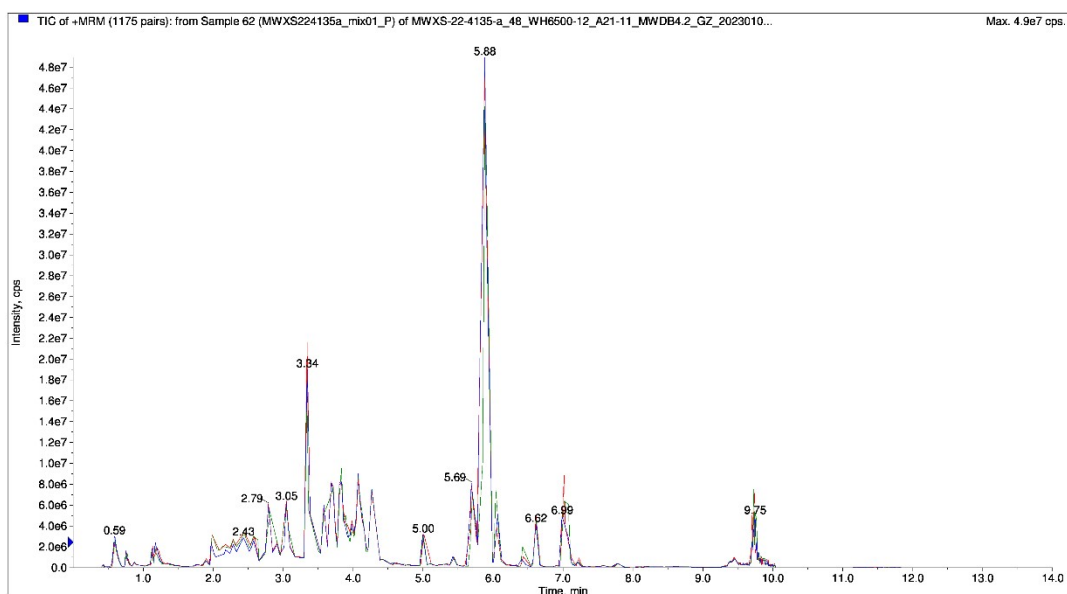

**Fig. S2 OPLS-DA permutation test.**

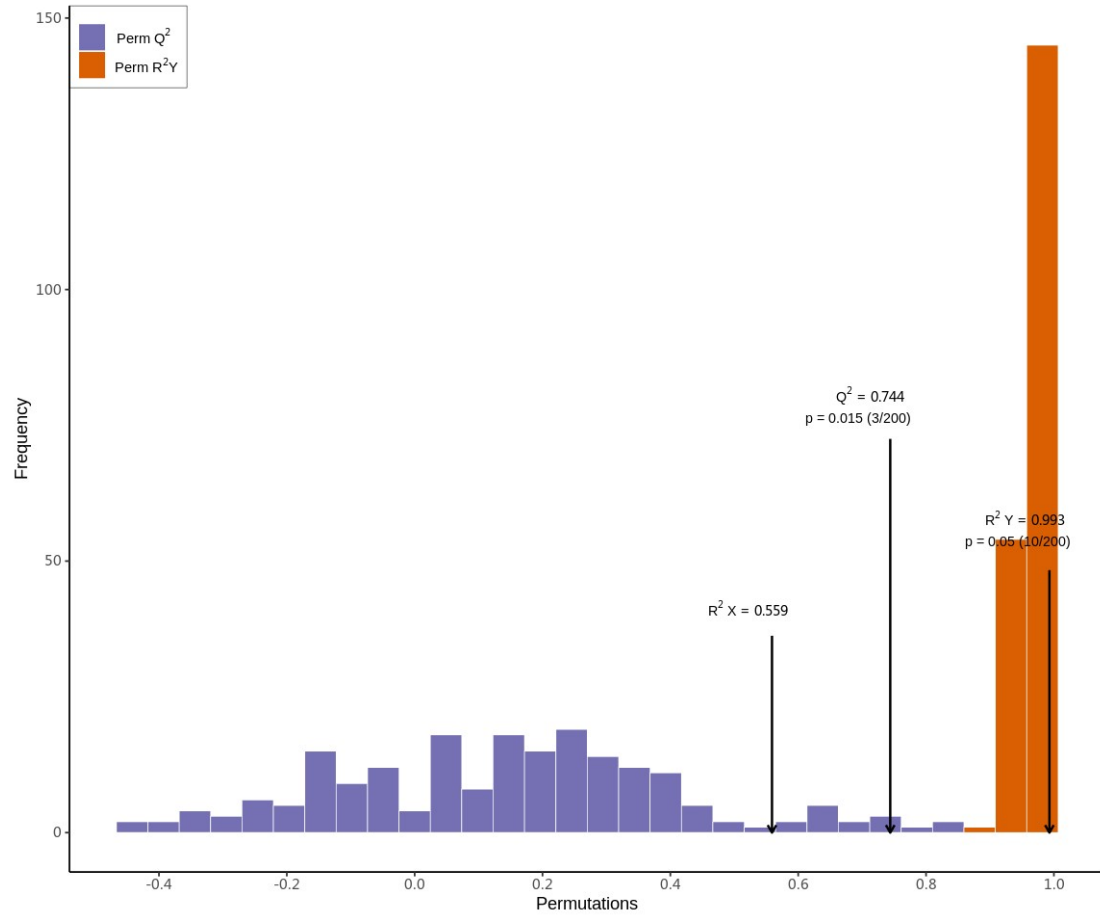

Supplement: d4fo01439a1.pdf [file d4fo01439a1.pdf]
