# Supplementary material for: Macronutrient digestion and polyphenol bioaccessibility in oat milk tea products: an in vitro gastrointestinal tract study
Source: Royal Society of Chemistry journal article supplement (doi:10.1039/d4fo01439a), 2024-01-01
Supplement: d4fo01439a2.pdf [file d4fo01439a2.pdf]

**Table. S1. The detail data for 411 phenolic compounds.**

| No. | Compounds                                        | Formula   | Class I        | Class II       | CAS         | Q1 (Da)  | Q3 (Da)  | Molecular weight (Da) | Ionization model | LF-OMTMS-D-1 | LF-OMTMS-D-2 | LF-OMTMS-D-3 | MF-OMTMS-D-1 | MF-OMTMS-D-2 | MF-OMTMS-D-3 | HF-OMTMS-D-1 | HF-OMTMS-D-2 | HF-OMTMS-D-3 |
|-----|--------------------------------------------------|-----------|----------------|----------------|-------------|----------|----------|-----------------------|------------------|--------------|--------------|--------------|--------------|--------------|--------------|--------------|--------------|--------------|
| 1   | 1-O-p-Coumaroylquinic acid                       | C16H18O8  | Phenolic acids | Phenolic acids | -           | 337.09   | 163.04   | 338.1002              | [M-H]-           | 21296398     | 14902495.2   | 21428995.6   | 20670086.7   | 21733345.8   | 14248843.9   | 21202013.4   | 19982307.5   | 22732608.9   |
| 2   | 2-Hydroxycinnamic acid*                          | C9H8O3    | Phenolic acids | Phenolic acids | 583-17-5    | 163.04   | 119.05   | 164.0473              | [M-H]-           | 11702959.9   | 10889151.1   | 10546549     | 10235525     | 10080350.3   | 10128075.3   | 14582851.4   | 14189657.7   | 13865588.7   |
| 3   | o-Hydroxycinnamic Acid*                          | C9H8O3    | Phenolic acids | Phenolic acids | 5801-57-0   | 163.0401 | 119.0502 | 164.0473              | [M-H]-           | 11484080.1   | 11357105.5   | 11321427.9   | 10374426.5   | 10119731.4   | 10238949.7   | 13246908.5   | 14873876.3   | 14013284.8   |
| 4   | 3-Hydroxycinnamic Acid*                          | C9H8O3    | Phenolic acids | Phenolic acids | 14755-02-3  | 163.04   | 119.05   | 164.0473              | [M-H]-           | 10174947.9   | 11073831.7   | 10269587.5   | 9745958.58   | 9401503.95   | 9845393.46   | 13637118.3   | 14054314.9   | 14139235     |
| 5   | Butyl isobutyl phthalate*                        | C16H22O4  | Phenolic acids | Phenolic acids | 17851-53-5  | 279.16   | 149.03   | 278.1518              | [M+H]+           | 11071447.8   | 10278557.2   | 12307095.8   | 8649993.58   | 10247829     | 9184439.39   | 9708835.52   | 9706888      | 10783181     |
| 6   | 4-O-Methylgallic Acid                            | C8H8O5    | Phenolic acids | Phenolic acids | 4319-02-2   | 183.03   | 124.02   | 184.0372              | [M-H]-           | 1908573.42   | 2230906.26   | 2075349.38   | 5283832.11   | 4507638.31   | 5285518.21   | 9004367.93   | 9663017.17   | 11061022.2   |
| 7   | Methyl gallate                                   | C8H8O5    | Phenolic acids | Phenolic acids | 99-24-1     | 183.03   | 124.02   | 184.0372              | [M-H]-           | 1639766.93   | 1845745.97   | 1861219.3    | 4596875.12   | 4004415.44   | 4460316.52   | 7442354.24   | 7909577.23   | 9224934.07   |
| 8   | 3-O-p-Coumaroylquinic acid                       | C16H18O8  | Phenolic acids | Phenolic acids | 87099-71-6  | 337.09   | 191.06   | 338.1002              | [M-H]-           | 6870805.25   | 7136648.59   | 7047089.74   | 7362037.14   | 6657524.44   | 7202262.83   | 7223062.97   | 7745198.68   | 7798558.15   |
| 9   | 4-(3,4,5-Trihydroxybenzoyl)benzoic acid          | C14H10O7  | Phenolic acids | Phenolic acids | -           | 289.04   | 137.02   | 290.0427              | [M-H]-           | 7082310.23   | 6764209.51   | 5080971.72   | 5453492.9    | 4743469.84   | 5147226.73   | 6505821.73   | 4972151.24   | 7055673.61   |
| 10  | Phthalic anhydride                               | C8H4O3    | Phenolic acids | Phenolic acids | 85-44-9     | 149.02   | 65.04    | 148.016               | [M+H]+           | 7374407.55   | 7225989.86   | 8174042.31   | 7100987.46   | 7126100.42   | 5165476.37   | 5355508.35   | 6928134.32   | 6202811.26   |
| 11  | Ferulic acid*                                    | C10H10O4  | Phenolic acids | Phenolic acids | 537-98-4    | 193.05   | 134.04   | 194.0579              | [M-H]-           | 4534444.84   | 4191517.32   | 4261634.13   | 4844286.08   | 4437516.71   | 4424536.87   | 5229883.2    | 5090616.61   | 5126196.42   |
| 12  | 3-Galloylquinic acid                             | C14H16O10 | Phenolic acids | Phenolic acids | 17365-11-6  | 343.07   | 191.06   | 344.0751              | [M-H]-           | 3498357.24   | 3378167.91   | 3169330.56   | 4135508.8    | 4016862.62   | 4218911.06   | 4045162.17   | 4330015.55   | 4308978.89   |
| 13  | 5-O-p-Coumaroylquinic acid                       | C16H18O8  | Phenolic acids | Phenolic acids | 1899-30-5   | 337.09   | 191.06   | 338.1002              | [M-H]-           | 2960321.06   | 3327446.52   | 3501419.94   | 3662756.27   | 3567016.82   | 3845672.16   | 3960694.27   | 4195955.97   | 4096184.45   |
| 14  | Dimethyl phthalate                               | C10H10O4  | Phenolic acids | Phenolic acids | 131-11-3    | 195.06   | 163.04   | 194.0579              | [M+H]+           | 4971658.9    | 6031624.99   | 4717620.12   | 3110305.29   | 3963354      | 4178728.31   | 4147008.73   | 3878484.55   | 4215180.49   |
| 15  | 4-Hydroxybenzoic acid                            | C7H6O3    | Phenolic acids | Phenolic acids | 99-96-7     | 137.02   | 93.03    | 138.0317              | [M-H]-           | 3058025.61   | 3159386.16   | 2923961.22   | 3072831.12   | 3158008.42   | 3072402.47   | 3833794.25   | 3770062.88   | 3722624.21   |
| 16  | 4-Hydroxybenzaldehyde                            | C7H6O2    | Phenolic acids | Phenolic acids | 123-08-0    | 121.03   | 92.03    | 122.0368              | [M-H]-           | 3542189.6    | 3655526      | 3445210.69   | 3160460.73   | 2835170.56   | 2656221.14   | 3195330.63   | 3048636.5    | 3106045.13   |
| 17  | 2,5-Dihydroxybenzaldehyde                        | C7H6O3    | Phenolic acids | Phenolic acids | 1194-98-5   | 137.02   | 93.03    | 138.0317              | [M-H]-           | 2413115.61   | 2532170.59   | 2251703.09   | 2452020.85   | 2471300.13   | 2458317.07   | 2925034.73   | 3097795.72   | 2946586.78   |
| 18  | Isoferulic Acid*                                 | C10H10O4  | Phenolic acids | Phenolic acids | 25522-33-2  | 193.0506 | 134.0374 | 194.0579              | [M-H]-           | 2701623.19   | 2461465.16   | 2555785.23   | 2578774.79   | 2637701.7    | 2733818.27   | 3075105.33   | 3018062.22   | 2821667.4    |
| 19  | Caffeic acid                                     | C9H8O4    | Phenolic acids | Phenolic acids | 331-39-5    | 179.03   | 135.05   | 180.0423              | [M-H]-           | 1779940.56   | 1783909.98   | 1565851.87   | 2979366.16   | 2990165.95   | 2935740.88   | 2821906.27   | 2552963.37   | 2510066.49   |
| 20  | Gallic acid                                      | C7H6O5    | Phenolic acids | Phenolic acids | 149-91-7    | 169.01   | 125.02   | 170.0215              | [M-H]-           | 1939874.56   | 1845183.9    | 1627606.25   | 2312807.78   | 2284382.49   | 2260598.55   | 2328110.5    | 2517485.33   | 2379630.2    |
| 21  | 2-(Formylamino)benzoic acid                      | C8H7NO3   | Phenolic acids | Phenolic acids | 3342-77-6   | 164.04   | 120.05   | 165.0426              | [M-H]-           | 1971785.84   | 1763745.51   | 1824241.35   | 1692164.88   | 1685718.67   | 1604513.07   | 2198784.79   | 2211278.27   | 2126756.08   |
| 22  | Vanillin; 4-Hydroxy-3-Methoxybenzaldehyde*       | C8H8O3    | Phenolic acids | Phenolic acids | 121-33-5    | 151.04   | 136.02   | 152.0473              | [M-H]-           | 2254368.65   | 1930479      | 2126812.62   | 1939643.9    | 2082162.29   | 2031453.36   | 2019461.67   | 2372500.53   | 2075203      |
| 23  | 2,5-Dihydroxybenzoic acid; Gentisic Acid*        | C7H6O4    | Phenolic acids | Phenolic acids | 490-79-9    | 153.02   | 109.03   | 154.0266              | [M-H]-           | 2342169.36   | 2329211.34   | 2329523.03   | 2204344.25   | 2059050.05   | 2357386.34   | 1973992.24   | 2080327.44   | 2124394.75   |
| 24  | 2,3-Dihydroxybenzoic Acid*                       | C7H6O4    | Phenolic acids | Phenolic acids | 303-38-8    | 153.02   | 109.03   | 154.0266              | [M-H]-           | 2342169.36   | 2329211.34   | 2329523.03   | 2204344.25   | 2059050.05   | 2357386.34   | 1973992.24   | 2080327.44   | 2124394.75   |
| 25  | 3,4-Dihydroxybenzoic acid (Protocatechuic acid)* | C7H6O4    | Phenolic acids | Phenolic acids | 99-50-3     | 153.02   | 109.03   | 154.0266              | [M-H]-           | 2466642.51   | 2403845.31   | 2260731.63   | 2233766.3    | 2010634.14   | 2076159.69   | 1993379.29   | 1997891.62   | 2181255.23   |
| 26  | 3-O-Methylgallic acid                            | C8H8O5    | Phenolic acids | Phenolic acids | 3934-84-7   | 183.03   | 124.02   | 184.0372              | [M-H]-           | 1405659.69   | 1370557.79   | 1546313.29   | 1420482.54   | 1462529.15   | 1469950.3    | 1500293.88   | 1454404.23   | 1563933.04   |
| 27  | Coniferin                                        | C16H22O8  | Phenolic acids | Phenolic acids | 531-29-3    | 341.12   | 179.07   | 342.1315              | [M-H]-           | 1135655.5    | 966010.304   | 1109370.62   | 1392240.57   | 1330933.05   | 1488469.33   | 1266152      | 1458409.03   | 1492672.92   |
| 28  | Nordihydrocapsiate                               | C17H26O4  | Phenolic acids | Phenolic acids | 220012-53-3 | 293.18   | 221.16   | 294.1831              | [M-H]-           | 1373675.77   | 1674848.33   | 1446870.01   | 1009801.81   | 1232574.26   | 1600082.14   | 1274003.68   | 1336727.8    | 1191364.74   |
| 29  | Methyl cumalate*                                 | C7H6O4    | Phenolic acids | Phenolic acids | 6018-41-3   | 153.02   | 109.03   | 154.0266              | [M-H]-           | 1445859.24   | 1231188.11   | 1251315.11   | 1250822.75   | 1216791.51   | 1318675.72   | 1096351.34   | 1144797.72   | 1103544.47   |
| 30  | 4-Methoxycinnamaldehyde                          | C10H10O2  | Phenolic acids | Phenolic acids | 1963-36-6   | 163.08   | 91.05    | 162.0681              | [M+H]+           | 1243590.38   | 1387805.82   | 1485428.86   | 1158803.82   | 1214953.02   | 1286335.58   | 1121625.63   | 1073411.17   | 1043180.69   |
| 31  | Protocatechuic acid 1-O-(Glucosylvanilloyl)*     | C21H22O12 | Phenolic acids | Phenolic acids | -           | 465.1    | 303.05   | 466.1111              | [M-H]-           | 511603.74    | 482634.43    | 443232.007   | 739135.838   | 652690.659   | 625912.341   | 867805.378   | 887829.337   | 955663.305   |
| 32  | 1-O-Salicyloyl-β-D-glucose*                      | C13H16O8  | Phenolic acids | Phenolic acids | 60517-74-0  | 299.08   | 137.02   | 300.0845              | [M-H]-           | 632258.831   | 569863.945   | 582547       | 1001252.82   | 1098266.5    | 1153194.71   | 845789.207   | 862957.039   | 913109.615   |
| 33  | Glucosyloxybenzoic acid*                         | C13H16O8  | Phenolic acids | Phenolic acids | -           | 299.08   | 137.02   | 300.0845              | [M-H]-           | 632258.831   | 569863.945   | 582547       | 1001252.82   | 1098266.5    | 1153194.71   | 845789.207   | 862957.039   | 913109.615   |
| 34  | Glucosyringic acid                               | C15H20O10 | Phenolic acids | Phenolic acids | 33228-65-8  | 359.1    | 197.05   | 361.1129              | [M-H]-           | 381272.481   | 400952.663   | 418414.809   | 541639.534   | 641514.247   | 581905.868   | 871079.112   | 879989.923   | 842525.061   |
| 35  | Salidroside                                      | C14H20O7  | Phenolic acids | Phenolic acids | 10338-51-9  | 299.11   | 137.02   | 300.1209              | [M-H]-           | 508882.839   | 572592.748   | 538798.078   | 1012072.03   | 932553.426   | 887629.365   | 870551.543   | 844649.839   | 838650.881   |
| 36  | 4-Nitrophenol                                    | C6H5NO3   | Phenolic acids | Phenolic acids | 100-02-7    | 140.03   | 98.96    | 139.0269              | [M+H]+           | 13075656.9   | 12180580     | 1204261.1    | 1373444.53   | 1607729.14   | 1652747.62   | 739515.902   | 697427.545   | 1039870.08   |
| 37  | Benzamide                                        | C7H7NO    | Phenolic acids | Phenolic acids | 55-21-0     | 122.06   | 105.03   | 121.0528              | [M+H]+           | 1012020.78   | 943822.597   | 1003477.17   | 909934.302   | 802345.65    | 879871.594   | 702852.815   | 812880.411   | 759953.857   |
| 38  | 2-O-Galloyl-D-glucose*                           | C13H16O10 | Phenolic acids | Phenolic acids | -           | 331.07   | 169.01   | 332.0743              | [M-H]-           | 813166.149   | 824879.908   | 593137.883   | 67384.0007   | 694096.907   | 539178.301   | 899573.003   | 99801.5007   | 1147701.17   |
| 39  | Phloroglucinol; 1,3,5-Benzenetriol               | C6H6O3    | Phenolic acids | Phenolic acids | 108-73-6    | 127.04   | 81.03    | 126.0317              | [M+H]+           | 714628.637   | 627568.598   | 787268.967   | 594816.02    | 433908.206   | 609273.353   | 604966.631   | 642249.354   | 888436.512   |
| 40  | Dumaliinamide A*                                 | C21H22O10 | Phenolic acids | Phenolic acids | -           | 433.11   | 271.06   | 434.1213              | [M-H]-           | 588759.706   | 532545.225   | 512086.933   | 658345.108   | 649776.945   | 657321.077   | 666652.911   | 708015.939   | 749820.819   |

|    |                                                  |           |                |                |              |          |          |            |                    |            |            |            |            |            |            |            |            |            |
|----|--------------------------------------------------|-----------|----------------|----------------|--------------|----------|----------|------------|--------------------|------------|------------|------------|------------|------------|------------|------------|------------|------------|
| 41 | Isovanillin                                      | C8H8O3    | Phenolic acids | Phenolic acids | 621-59-0     | 153.05   | 65.04    | 152.0473   | [M+H] <sup>+</sup> | 878706.424 | 546059.105 | 780874.689 | 671992.127 | 710702.094 | 715966.104 | 660641.854 | 732529.26  | 670926.615 |
| 42 | 3-O-Caffeoylshikimic acid*                       | C16H16O8  | Phenolic acids | Phenolic acids | -            | 335.08   | 179.03   | 336.084518 | [M-H] <sup>-</sup> | 734506.915 | 654661.519 | 643056.232 | 729031.839 | 655087.996 | 769771.319 | 643725.077 | 609511.464 | 764317.217 |
| 43 | 4-Caffeoylshikimic acid*                         | C16H16O8  | Phenolic acids | Phenolic acids | -            | 335.08   | 179.03   | 336.0845   | [M-H] <sup>-</sup> | 734506.915 | 654661.519 | 643056.232 | 729031.839 | 655087.996 | 769771.319 | 643725.077 | 609511.464 | 764317.217 |
| 44 | 5-O-Caffeoylshikimic acid                        | C16H16O8  | Phenolic acids | Phenolic acids | 73263-62-4   | 335.08   | 135.05   | 336.0845   | [M-H] <sup>-</sup> | 667748.306 | 591361.995 | 586490.57  | 600922.746 | 627108.661 | 676127.595 | 636566.02  | 616599.976 | 673927.841 |
| 45 | 4-O-p-Coumaroylquinic acid                       | C16H18O8  | Phenolic acids | Phenolic acids | 32451-86-8   | 337.09   | 163.04   | 338.1002   | [M-H] <sup>-</sup> | 594097.945 | 595002.857 | 529494.069 | 568103.96  | 549829.136 | 563676.052 | 641283.814 | 616842.485 | 640149.225 |
| 46 | 2,4-Di-Tert-Butylphenol*                         | C14H22O   | Phenolic acids | Phenolic acids | 96-76-4      | 205.1598 | 189.1267 | 206.1671   | [M-H] <sup>-</sup> | 553984.891 | 750167.022 | 739801.771 | 711499.92  | 682784.191 | 665814.18  | 674379.363 | 674473.305 | 537110.624 |
| 47 | Eugenol                                          | C10H12O2  | Phenolic acids | Phenolic acids | 97-53-0      | 165.09   | 91.05    | 164.0837   | [M+H] <sup>+</sup> | 702101.047 | 555971.137 | 881084.612 | 492526.11  | 385616.479 | 519423.307 | 581867.102 | 706318.571 | 586444.511 |
| 48 | 4-Hydroxyacetophenone                            | C8H8O2    | Phenolic acids | Phenolic acids | 99-93-4      | 135.05   | 92.03    | 136.0524   | [M-H] <sup>-</sup> | 717663.02  | 558622.981 | 698741.845 | 657997.991 | 588899.976 | 565758.214 | 649941.702 | 613657.967 | 609550.625 |
| 49 | Phenyl acetate                                   | C8H8O2    | Phenolic acids | Phenolic acids | 122-79-2     | 135.05   | 92.03    | 136.0524   | [M-H] <sup>-</sup> | 731175.481 | 705949.871 | 694122.63  | 699536.306 | 694564.67  | 598263.915 | 606767.337 | 616729.86  | 639185.849 |
| 50 | 2,6-Di-tert-butylphenol*                         | C14H22O   | Phenolic acids | Phenolic acids | 128-39-2     | 205.16   | 189.13   | 206.1671   | [M-H] <sup>-</sup> | 589965.389 | 724764.194 | 799790.502 | 726001.277 | 740009.989 | 793488.446 | 639362.13  | 681931.139 | 519784.418 |
| 51 | Sinapic acid                                     | C11H12O5  | Phenolic acids | Phenolic acids | 530-59-6     | 223.06   | 193.02   | 224.0685   | [M-H] <sup>-</sup> | 67682.4881 | 51625.1426 | 70575.7545 | 847206.383 | 822014.463 | 775020.98  | 601498.424 | 571260.099 | 582672.942 |
| 52 | 6-O-Caffeoyl-D-glucose*                          | C15H18O9  | Phenolic acids | Phenolic acids | -            | 341.09   | 179.03   | 342.0951   | [M-H] <sup>-</sup> | 426442.323 | 483655.185 | 468934.794 | 530510.672 | 496104.37  | 470269.325 | 581614.96  | 550035.345 | 607033.544 |
| 53 | 1-O-Caffeoyl-β-D-glucose*                        | C15H18O9  | Phenolic acids | Phenolic acids | 14364-08-0   | 341.09   | 179.04   | 342.0951   | [M-H] <sup>-</sup> | 509530.417 | 454094.82  | 438177.612 | 520798.706 | 565359.858 | 563778.965 | 595428.085 | 597623.099 | 530222.364 |
| 54 | Neochlorogenic acid (5-O-Caffeoylquinic acid)*   | C16H18O9  | Phenolic acids | Phenolic acids | 906-33-2     | 353.09   | 191.06   | 354.0951   | [M-H] <sup>-</sup> | 487989.753 | 520193.216 | 504333.15  | 482315.919 | 537326.25  | 580285.528 | 599666.449 | 567363.215 | 545652.258 |
| 55 | 1-O-Sinapoyl-β-D-glucose                         | C17H22O10 | Phenolic acids | Phenolic acids | -            | 385.11   | 223.06   | 386.1213   | [M-H] <sup>-</sup> | 212109.388 | 199120.152 | 167958.93  | 441696.215 | 403300.411 | 361277.348 | 531168.15  | 568670.925 | 598515.126 |
| 56 | Syringic acid                                    | C9H10O5   | Phenolic acids | Phenolic acids | 530-57-4     | 197.05   | 123.01   | 198.0528   | [M-H] <sup>-</sup> | 409717.774 | 414310.705 | 372650.617 | 407886.454 | 423712.715 | 435542.506 | 571926.813 | 584438.389 | 509473.445 |
| 57 | 4-O-Glucosyl-sinapate                            | C17H22O10 | Phenolic acids | Phenolic acids | -            | 385.11   | 223.06   | 386.1213   | [M-H] <sup>-</sup> | 233971.392 | 217114.868 | 158441.556 | 392183.177 | 411381.042 | 365319.001 | 553757.678 | 530453.506 | 530171.073 |
| 58 | Chlorogenic acid (3-O-Caffeoylquinic acid)*      | C16H18O9  | Phenolic acids | Phenolic acids | 327-97-9     | 353.09   | 191.06   | 354.0951   | [M-H] <sup>-</sup> | 425723.484 | 428685.7   | 397611.491 | 435013.42  | 454706.575 | 472680.784 | 524869.9   | 529585.91  | 485296.996 |
| 59 | Greenaldehyde F                                  | C15H18O9  | Phenolic acids | Phenolic acids | 1094004-50-8 | 341.09   | 135.04   | 342.0951   | [M-H] <sup>-</sup> | 342952.673 | 367819.683 | 396250.374 | 486353.097 | 501052.501 | 500650.32  | 526055.039 | 473815.696 | 523596.195 |
| 60 | Dumaliinonide C*                                 | C21H22O11 | Phenolic acids | Phenolic acids | -            | 449.11   | 287.06   | 450.1162   | [M-H] <sup>-</sup> | 518667.895 | 522915.672 | 507535.248 | 521707.073 | 501809.643 | 502861.665 | 515201.212 | 483988.607 | 495701.843 |
| 61 | 1-O-Vanilloyl-D-Glucose                          | C14H18O9  | Phenolic acids | Phenolic acids | -            | 329.11   | 167.03   | 330.0951   | [M-H] <sup>-</sup> | 378063.466 | 525558.827 | 515748.276 | 466098.608 | 406110.64  | 408986.162 | 496986.136 | 509645.139 | 455365.597 |
| 62 | devidoside C*                                    | C15H16O9  | Phenolic acids | Phenolic acids | -            | 339.07   | 177.02   | 340.0794   | [M-H] <sup>-</sup> | 639721.675 | 574549.934 | 609063.852 | 538795.541 | 477102.881 | 554598.819 | 513742.107 | 441476.817 | 499223.796 |
| 63 | 5-Glucosyloxy-2-Hydroxybenzoic acid methyl ester | C14H18O9  | Phenolic acids | Phenolic acids | -            | 329.09   | 167.04   | 330.0951   | [M-H] <sup>-</sup> | 399557.957 | 509168.987 | 530107.065 | 450931.707 | 380126.016 | 413365.081 | 470831.702 | 490936.868 | 474591.382 |
| 64 | Caffeic aldehyde                                 | C9H8O3    | Phenolic acids | Phenolic acids | 141632-15-7  | 165.05   | 91.05    | 164.0473   | [M+H] <sup>+</sup> | 582348.648 | 682501.958 | 887953.761 | 654124.17  | 354051.134 | 534017.857 | 455892.883 | 495924.882 | 467250.41  |
| 65 | Trihydroxycinnamoylquinic acid                   | C16H20O10 | Phenolic acids | Phenolic acids | -            | 371.1    | 249.06   | 372.1056   | [M-H] <sup>-</sup> | 786962.529 | 734650.924 | 796333.812 | 453501.895 | 418413.342 | 404032.77  | 469295.665 | 416175.959 | 499740.162 |
| 66 | Methyl 4-hydroxybenzoate*                        | C8H8O3    | Phenolic acids | Phenolic acids | 99-76-3      | 151.04   | 136.02   | 152.0473   | [M-H] <sup>-</sup> | 435647.573 | 427823.414 | 448080.712 | 407686.826 | 437846.544 | 406886.352 | 427137.753 | 476159.318 | 424049.118 |
| 67 | 2,4-Dinitrophenol                                | C6H4N2O5  | Phenolic acids | Phenolic acids | 51-28-5      | 183      | 109.02   | 184.012    | [M-H] <sup>-</sup> | 439376.116 | 508445.488 | 511463.745 | 399147.855 | 394972.709 | 393018.824 | 406909.368 | 409169.032 | 417552.728 |
| 68 | p-Coumaric acid                                  | C9H8O3    | Phenolic acids | Phenolic acids | 501-98-4     | 165.05   | 119.05   | 164.0473   | [M+H] <sup>+</sup> | 567508.557 | 545021.781 | 570883.814 | 439163.151 | 378960.357 | 367438.247 | 416390.739 | 379983.585 | 414860.555 |
| 69 | 3,4-Dihydroxybenzoic acid*                       | C8H8O4    | Phenolic acids | Phenolic acids | 102-32-9     | 167.03   | 123.05   | 168.0423   | [M-H] <sup>-</sup> | 248875.5   | 251541.925 | 254251.949 | 327330.221 | 355517.917 | 356430.288 | 392318.465 | 413750.684 | 379294.687 |
| 70 | 5-O-Galloyl-D-hammamelose*                       | C13H16O10 | Phenolic acids | Phenolic acids | -            | 331.07   | 169.02   | 332.0743   | [M-H] <sup>-</sup> | 342493.727 | 324260.753 | 317027.437 | 362328.969 | 331714.946 | 342211.388 | 354761.707 | 374990.155 | 397033.897 |
| 71 | 1-O-Galloyl-β-D-glucose*                         | C13H16O10 | Phenolic acids | Phenolic acids | 58511-73-2   | 331.07   | 169.01   | 332.0743   | [M-H] <sup>-</sup> | 326466.636 | 336864.77  | 340358.355 | 332982.867 | 314006.17  | 332823.157 | 347066.618 | 386063.2   | 375642.488 |
| 72 | 6-O-Galloyl-β-D-glucose*                         | C13H16O10 | Phenolic acids | Phenolic acids | 13186-19-1   | 331.07   | 169.01   | 332.0743   | [M-H] <sup>-</sup> | 326466.636 | 336864.77  | 340358.355 | 332982.867 | 314006.17  | 332823.157 | 347066.618 | 386063.2   | 375642.488 |
| 73 | Digalloylglucose*                                | C20H20O14 | Phenolic acids | Phenolic acids | -            | 483.08   | 169.05   | 484.0853   | [M-H] <sup>-</sup> | 317600.488 | 233573.625 | 252005.446 | 218704.181 | 216840.689 | 221537.945 | 345324.202 | 374360.009 | 357197.223 |
| 74 | Isochlorogenic acid B*                           | C25H24O12 | Phenolic acids | Phenolic acids | 14534-61-3   | 515.12   | 353.09   | 516.1268   | [M-H] <sup>-</sup> | 124007.044 | 134100.565 | 56395.9674 | 192667.045 | 206357.307 | 161357.101 | 357945.013 | 307172.002 | 408684.191 |
| 75 | Gallic Acid Ethyl Ester; Ethyl gallate           | C9H10O5   | Phenolic acids | Phenolic acids | 831-61-8     | 197.05   | 124.02   | 198.0528   | [M-H] <sup>-</sup> | 296431.153 | 272613.638 | 248213.888 | 295796.229 | 293622.854 | 292308.525 | 347889.455 | 345646.182 | 379644.345 |
| 76 | 3-O-Galloyl-D-glucose*                           | C13H16O10 | Phenolic acids | Phenolic acids | -            | 331.07   | 169.01   | 332.0743   | [M-H] <sup>-</sup> | 355913.065 | 332707.465 | 324660.989 | 360855.901 | 315014.782 | 343134.955 | 311871.912 | 38835.114  | 353718.01  |
| 77 | Diisobutyl phthalate*                            | C16H22O4  | Phenolic acids | Phenolic acids | 84-69-5      | 279.1591 | 149.0233 | 278.1518   | [M+H] <sup>+</sup> | 564387.718 | 375798.198 | 464588.938 | 401763.108 | 435552.929 | 48953.1758 | 270698.959 | 419107.855 | 353194.706 |
| 78 | 4-Hydroxyphenylacetic acid*                      | C8H8O3    | Phenolic acids | Phenolic acids | 156-38-7     | 151.04   | 107.05   | 152.0473   | [M-H] <sup>-</sup> | 296546.039 | 287452.427 | 271771.969 | 239057.116 | 300712.939 | 289455.069 | 270789.166 | 392226.915 | 376726.934 |
| 79 | Anthranilic Acid                                 | C7H7NO2   | Phenolic acids | Phenolic acids | 118-92-3     | 138.06   | 92.05    | 137.0477   | [M+H] <sup>+</sup> | 446324.721 | 445458.289 | 424822.753 | 302091.305 | 373967.16  | 368393.632 | 321906.074 | 329903.314 | 364490.036 |
| 80 | Propyl 4-hydroxybenzoate                         | C10H12O3  | Phenolic acids | Phenolic acids | 94-13-3      | 179.07   | 92.03    | 180.0786   | [M-H] <sup>-</sup> | 128036.021 | 191142.762 | 182271.853 | 175293.768 | 142987.459 | 166710.154 | 322799.987 | 303607.167 | 332747.7   |
| 81 | Phthalic acid                                    | C8H6O4    | Phenolic acids | Phenolic acids | 88-99-3      | 165.02   | 77.04    | 166.0266   | [M-H] <sup>-</sup> | 3513766.02 | 551707.251 | 496446.621 | 504460.479 | 1402577.15 | 1339783.39 | 399007.304 | 256740.868 | 300455.978 |
| 82 | Isochlorogenic acid C*                           | C25H24O12 | Phenolic acids | Phenolic acids | 57378-72-0   | 515.12   | 353.09   | 516.1268   | [M-H] <sup>-</sup> | 174059.354 | 123743.667 | 52852.2884 | 169494.902 | 201174.38  | 171724.407 | 361707.093 | 203432.574 | 381541.603 |







|     |                                                                                                                |           |            |                  |              |          |          |            |        |            |            |            |            |            |            |            |            |            |
|-----|----------------------------------------------------------------------------------------------------------------|-----------|------------|------------------|--------------|----------|----------|------------|--------|------------|------------|------------|------------|------------|------------|------------|------------|------------|
| 209 | Hesperetin-5-O-glucoside                                                                                       | C22H24O11 | Flavonoids | Flavanones       | 69651-80-5   | 463.12   | 301.07   | 464.1319   | [M-H]- | 455748.531 | 529312.347 | 341796.548 | 1028142.43 | 1008044.13 | 1111913.27 | 2688568.49 | 2834596.69 | 3880119    |
| 210 | Quercetin-7-O-glucoside*                                                                                       | C21H20O12 | Flavonoids | Flavonols        | 491-50-9     | 463.09   | 301.04   | 464.0955   | [M-H]- | 452057.822 | 445017.272 | 272312.892 | 892933.843 | 826908.124 | 1180745.7  | 2491273.46 | 2507147.37 | 3691012.63 |
| 211 | Quercetin 3-xyloyl-(1->6)-glucoside                                                                            | C26H28O16 | Flavonoids | Flavones         | -            | 595.14   | 134.05   | 596.137735 | [M-H]- | 1371754.41 | 1081944.86 | 1340157.67 | 1415160.4  | 1304481.21 | 1440066.33 | 2511555.3  | 2572278.21 | 2210860.43 |
| 212 | Gallocatechin 3-O-gallate*                                                                                     | C22H18O11 | Flavonoids | Flavanols        | 5127-64-0    | 457.08   | 169.01   | 458.0849   | [M-H]- | 1341849.05 | 803428.136 | 888131.166 | 2267294.22 | 1977962.24 | 2014408.23 | 1943235.25 | 2155624.37 | 2045512.92 |
| 213 | 4'-O-Glucosylvitexin                                                                                           | C27H30O15 | Flavonoids | Flavones         | 38950-94-6   | 595.17   | 433.12   | 594.1585   | [M+H]+ | 1908101    | 2035668.27 | 1914801.15 | 1897242    | 1727236.73 | 1995618.18 | 1912882.2  | 1960299.81 | 2004628.02 |
| 214 | Kaempferol-7-O-glucoside*                                                                                      | C21H20O11 | Flavonoids | Flavonols        | 16290-07-6   | 447.09   | 285.04   | 448.1006   | [M-H]- | 303188.176 | 305734.892 | 247274.819 | 698574.801 | 638674.174 | 732649.002 | 1596767.78 | 1743625.48 | 2301864.76 |
| 215 | Kaempferol-3-O-galactoside (Trifolin)*                                                                         | C21H20O11 | Flavonoids | Flavonols        | 23627-87-4   | 447.09   | 285.04   | 448.1006   | [M-H]- | 321004.479 | 305908.575 | 213722.393 | 686313.416 | 615340.738 | 761976.392 | 1627863.71 | 1528297.64 | 2264533.45 |
| 216 | Quercetin-3-O-robinobioside                                                                                    | C27H30O16 | Flavonoids | Flavonols        | 52525-35-6   | 609.15   | 300.03   | 610.1534   | [M-H]- | 678256.876 | 726892.212 | 541386.57  | 840664.061 | 779403.879 | 916269.372 | 1397347.77 | 1415233.34 | 1511621.39 |
| 217 | Luteolin-4'-O-glucoside*                                                                                       | C21H20O11 | Flavonoids | Flavones         | 6920-38-3    | 449.11   | 287.05   | 448.1006   | [M+H]+ | 939965.77  | 861731.742 | 600392.947 | 1222739.83 | 1127253.31 | 893579.175 | 1267243.61 | 1590345.82 | 1329505.03 |
| 218 | Kaempferol-3-O-glucoside (Astragaln)*                                                                          | C21H20O11 | Flavonoids | Flavonols        | 480-10-4     | 449.1078 | 287.0553 | 448.1006   | [M+H]+ | 927220.27  | 840695.168 | 751285.006 | 840198.244 | 837901.11  | 872426.212 | 633001.838 | 1456413.66 | 1918861.67 |
| 219 | Epicatechin*                                                                                                   | C15H14O6  | Flavonoids | Flavanols        | 490-46-0     | 291.0863 | 139.0397 | 290.079    | [M+H]+ | 1506755.68 | 1381641.25 | 1289976.52 | 1070080.88 | 1058108.46 | 1123042.14 | 1200705.73 | 1107058.49 | 1337390.45 |
| 220 | Kaempferol-4'-O-glucoside*                                                                                     | C21H20O11 | Flavonoids | Flavonols        | -            | 449.11   | 287.06   | 448.1006   | [M+H]+ | 667303.552 | 827759.447 | 632765.889 | 751084.088 | 639730.857 | 1064282.28 | 823546.88  | 808504.971 | 1852982.48 |
| 221 | Quercetin-3-O-rutinoside (Rutin)                                                                               | C27H30O16 | Flavonoids | Flavonols        | 153-18-4     | 609.15   | 301.04   | 610.1534   | [M-H]- | 572950.012 | 490353.212 | 391357.203 | 771459.519 | 645255.724 | 602315.463 | 1041467.82 | 1008284.22 | 1302361.87 |
| 222 | Isohemiphloin                                                                                                  | C21H22O10 | Flavonoids | Flavanones       | 3682-02-8    | 433.11   | 313.07   | 434.1213   | [M-H]- | 1076164.53 | 989065.023 | 1152685.77 | 1251644.03 | 973290.589 | 1002998.44 | 1084672.8  | 1028849.74 | 1047747.16 |
| 223 | Taxifolin-3'-O-glucoside*                                                                                      | C21H22O12 | Flavonoids | Flavanonols      | 31106-05-5   | 465.13   | 303.05   | 466.1111   | [M-H]- | 633476.852 | 542042.692 | 537202.355 | 672062.595 | 651898.233 | 760872.729 | 1017922.16 | 997527.923 | 1114865.47 |
| 224 | 1,8-dihydroxy-4,5-dimethoxy-3-[(2s,3r,4s,5s,6r)-3,4,5-trihydroxy-6-(hydroxymethyl)oxan-2-yl]oxy xanthen-9-one* | C21H22O12 | Flavonoids | Other Flavonoids | -            | 465.1    | 303.05   | 466.1111   | [M-H]- | 566317.374 | 593562.085 | 564520.955 | 741938.24  | 660482.932 | 633920.978 | 999574.541 | 807933.597 | 1154453.7  |
| 225 | Isovitexin-2''-O-rhamnoside                                                                                    | C27H30O14 | Flavonoids | Flavones         | -            | 579.17   | 313.07   | 578.1636   | [M+H]+ | 866414.131 | 898738.222 | 1010474.56 | 850749.466 | 953400.384 | 884558.049 | 968164.956 | 981412.883 | 961340.845 |
| 226 | Quercetin-5-O-β-D-glucoside*                                                                                   | C21H20O12 | Flavonoids | Flavonols        | -            | 465.1    | 303.05   | 464.0955   | [M+H]+ | 45547.113  | 223357.746 | 52420.8654 | 51853.607  | 261755.79  | 119535.977 | 1223228.62 | 462232.857 | 1005375.81 |
| 227 | 3,4,2',4',6'-Pentahydroxychalcone                                                                              | C15H12O6  | Flavonoids | Chalcones        | 73692-51-0   | 289.07   | 163.04   | 288.0634   | [M+H]+ | 1001597.46 | 873981.243 | 636644.372 | 501899.369 | 555207.997 | 602992.732 | 923575.883 | 829700.252 | 855243.349 |
| 228 | Epicatechin glucoside                                                                                          | C21H24O11 | Flavonoids | Flavanols        | -            | 451.12   | 289.07   | 452.1319   | [M-H]- | 1484760.19 | 1255589.71 | 158429.246 | 1093178.16 | 69252.9855 | 1024562.77 | 104607.513 | 1121044.75 | 1210074.53 |
| 229 | Isosaponarin[Isovitexin-4''-O-glucoside]                                                                       | C27H30O15 | Flavonoids | Flavones         | 19416-87-6   | 595.17   | 313.07   | 594.1585   | [M+H]+ | 711597.206 | 694321.3   | 738377.34  | 663937.095 | 603569.848 | 723885.365 | 726034.916 | 821342.233 | 768824.303 |
| 230 | Apigenin-6-C-(2''-glucuroyl)xyloside                                                                           | C26H26O15 | Flavonoids | Flavones         | -            | 579.13   | 283.06   | 578.1272   | [M+H]+ | 775172.137 | 648034.494 | 754237.46  | 746799.563 | 504238.143 | 657899.383 | 639707.302 | 664011.8   | 851045.576 |
| 231 | Naringenin-4'-O-glucoside*                                                                                     | C21H22O10 | Flavonoids | Flavanones       | -            | 433.12   | 271.06   | 434.1213   | [M-H]- | 520345.862 | 502233.971 | 538413.582 | 641616.596 | 573160.398 | 597089.1   | 634969.712 | 726860.122 | 762040.687 |
| 232 | Quercetin-3-O-galactoside (Hyperin)*                                                                           | C21H20O12 | Flavonoids | Flavonols        | 482-36-0     | 465.1    | 303.06   | 464.0955   | [M+H]+ | 47752.0677 | 87093.3459 | 103810.889 | 97602.4412 | 187106.517 | 341454.76  | 570531.5   | 539067.655 | 993533.223 |
| 233 | Isohyperoside*                                                                                                 | C21H20O12 | Flavonoids | Flavonols        | 35589-21-0   | 465.1019 | 303.0613 | 464.0955   | [M+H]+ | 47752.0677 | 87093.3459 | 103810.889 | 97602.4412 | 187106.517 | 341454.76  | 570531.5   | 539067.655 | 993533.223 |
| 234 | Tricin-7-O-Glucoside*                                                                                          | C23H24O12 | Flavonoids | Flavones         | 32769-01-0   | 493.13   | 331.08   | 492.1268   | [M+H]+ | 372456.865 | 295201.575 | 229996.45  | 356320.833 | 366148.605 | 428503.241 | 606027.932 | 600641.881 | 893746.1   |
| 235 | Butin-7-O-glucoside*                                                                                           | C21H22O10 | Flavonoids | Flavanones       | -            | 433.11   | 271.06   | 434.1213   | [M-H]- | 557497.21  | 531237.545 | 461234.855 | 608051.827 | 571661.816 | 608179.001 | 696379.512 | 669752.543 | 700753.71  |
| 236 | Apigenin-6,8-di-C-arabinoside*                                                                                 | C25H26O13 | Flavonoids | Flavones         | -            | 535.14   | 499.12   | 534.1373   | [M+H]+ | 280789.028 | 232218.082 | 237742.066 | 331725.158 | 278345.886 | 366898.877 | 591020.457 | 747719.467 | 706862.414 |
| 237 | Luteolin-7-O-glucoside (Cynaroside)*                                                                           | C21H20O11 | Flavonoids | Flavones         | 5373-11-5    | 449.11   | 287.07   | 448.1006   | [M+H]+ | 751454.992 | 745490.243 | 673975.821 | 756535.887 | 813354.635 | 889618.969 | 1123256.69 | 204029.984 | 622022.144 |
| 238 | Apigenin-6-C-arabinoside-8-C-xyloside*                                                                         | C25H26O13 | Flavonoids | Flavones         | -            | 535.14   | 499.12   | 534.1373   | [M+H]+ | 233154.294 | 200923.356 | 142325.856 | 318267.061 | 297703.044 | 291924.217 | 558817.046 | 544011.435 | 722476.652 |
| 239 | Jacoesidin-7-O-Glucoside*                                                                                      | C23H24O12 | Flavonoids | Flavones         | 25474-11-7   | 493.14   | 331.08   | 492.1268   | [M+H]+ | 312085.076 | 291704.138 | 204325.993 | 300853.502 | 343062.752 | 412460.939 | 525550.497 | 458339.847 | 705757.633 |
| 240 | Apigenin-6-C-(2''-glucosyl)arabinoside                                                                         | C26H28O14 | Flavonoids | Flavones         | -            | 565.16   | 427.1    | 564.1479   | [M+H]+ | 497919.496 | 432943.242 | 390366.69  | 526285.349 | 577932.497 | 515247.615 | 590617.04  | 559363.254 | 534182.443 |
| 241 | Isochaetoflside                                                                                                | C26H28O14 | Flavonoids | Flavones         | 52012-29-0   | 565.16   | 409.09   | 564.1479   | [M+H]+ | 530183.403 | 465530.138 | 385933.646 | 456993.672 | 464112.649 | 504119.389 | 495918.931 | 530111.726 | 622044.972 |
| 242 | 6-C-Glucosyl-2-Hydroxynaringenin                                                                               | C21H22O11 | Flavonoids | Flavanones       | -            | 449.11   | 269.05   | 450.1162   | [M-H]- | 622605.705 | 592203.539 | 580460.878 | 509786.007 | 503945.026 | 518470.013 | 532900.638 | 472169.728 | 580890.756 |
| 243 | Dihydrokaempferide                                                                                             | C16H14O6  | Flavonoids | Flavanonols      | 137225-59-3  | 303.09   | 229.08   | 302.079    | [M+H]+ | 117396.499 | 103089.214 | 46845.3147 | 182132.706 | 204947.162 | 216551.27  | 405379.433 | 479405.108 | 667434.72  |
| 244 | Luteolin-3'-O-glucoside*                                                                                       | C21H20O11 | Flavonoids | Flavones         | -            | 449.11   | 287.06   | 448.1006   | [M+H]+ | 130910.861 | 207164.836 | 78585.6587 | 150759.481 | 238609.228 | 383656.371 | 456053.283 | 366829.487 | 713858.377 |
| 245 | Aromadendrin-7-O-glucoside*                                                                                    | C21H22O11 | Flavonoids | Flavanonols      | 28189-90-4   | 449.11   | 287.06   | 450.1162   | [M-H]- | 592612.88  | 554614.122 | 516828.33  | 465993.459 | 464400.414 | 445071.465 | 534298.052 | 547507.708 | 431856.211 |
| 246 | 1,3,6,7-tetrahydroxy-2-(3,4,5-trihydroxyoxan-2-yl)xanthen-9-one                                                | C18H16O10 | Flavonoids | Other Flavonoids | -            | 391.07   | 229.05   | 392.0743   | [M-H]- | 495270.985 | 537092.724 | 458337.69  | 583264.968 | 537063.024 | 582548.694 | 313809.196 | 841470     | 210597.376 |
| 247 | Chrysoeriol-5-O-glucoside                                                                                      | C22H22O11 | Flavonoids | Flavones         | -            | 461.11   | 299.1    | 462.1162   | [M-H]- | 83106.0587 | 77629.9028 | 66624.5139 | 175186.703 | 142297.016 | 183497.46  | 414026.924 | 412310.032 | 508464.314 |
| 248 | Eriodictyol-8-C-glucoside*                                                                                     | C21H22O11 | Flavonoids | Flavanones       | 1023271-51-3 | 449.11   | 287.06   | 450.1162   | [M-H]- | 491374.041 | 457508.751 | 511191.619 | 405982.912 | 430345.385 | 384586.878 | 481862.318 | 437316.705 | 399574.779 |
| 249 | 1,2,3,7,8-pentahydroxy-6-methylanthracene-9,10-dione                                                           | C15H10O7  | Flavonoids | Other Flavonoids | -            | 303.05   | 229.05   | 302.0427   | [M+H]+ | 99831.9101 | 85280.9251 | 51441.5114 | 133382.123 | 80641.8851 | 133614.942 | 340836.461 | 355545.155 | 609335.195 |
| 250 | 1,2,4,5-tetrahydroxy-7-(hydroxymethyl)anthracene-9,10-dione                                                    | C15H10O7  | Flavonoids | Other Flavonoids | -            | 303.05   | 229.05   | 302.0427   | [M+H]+ | 140537.646 | 139785.902 | 118658.31  | 178106.834 | 149577.533 | 192621.764 | 364150.811 | 338671.738 | 540749.444 |









|     |                                                                                      |           |                       |                   |             |          |          |          |                      |            |            |            |            |            |            |            |            |            |
|-----|--------------------------------------------------------------------------------------|-----------|-----------------------|-------------------|-------------|----------|----------|----------|----------------------|------------|------------|------------|------------|------------|------------|------------|------------|------------|
| 377 | Fraxetin (7,8-Dihydroxy-6-methoxycoumarin)                                           | C10H8O5   | Lignans and Coumarins | Coumarins         | 574-84-5    | 209.04   | 149.02   | 208.0372 | [M+H] <sup>+</sup>   | 227281.283 | 231268.344 | 207945.379 | 192538.563 | 189794.188 | 157334.311 | 149839.022 | 173963.027 | 160365.725 |
| 378 | Lariciresinol-4'-O-glucoside                                                         | C26H34O11 | Lignans and Coumarins | Lignans           | 143663-00-7 | 521.2    | 359.15   | 522.2101 | [M-H] <sup>-</sup>   | 103402.656 | 127528.456 | 108162.59  | 113881.544 | 103636.281 | 117655.245 | 122893.698 | 105223.063 | 127669.171 |
| 379 | 6-Methylcoumarin                                                                     | C10H8O2   | Lignans and Coumarins | Coumarins         | 92-48-8     | 161.06   | 115.05   | 160.0524 | [M+H] <sup>+</sup>   | 81751.0919 | 91412.895  | 85433.3306 | 91779.26   | 117474.239 | 97644.0099 | 99396.3664 | 95760.4834 | 107903.448 |
| 380 | 7-Hydroxycoumarin,Umbelliferone                                                      | C9H6O3    | Lignans and Coumarins | Coumarins         | 93-35-6     | 161.02   | 133.03   | 162.0317 | [M-H] <sup>-</sup>   | 74645.1111 | 88427.0541 | 71154.9717 | 107160.143 | 89495.1211 | 94972.5267 | 111409.416 | 96643.1581 | 77045.5851 |
| 381 | Ethyl 3-coumarincarboxylate                                                          | C12H10O4  | Lignans and Coumarins | Coumarins         | 1846-76-0   | 219.06   | 173.03   | 218.0579 | [M+H] <sup>+</sup>   | 77889.4788 | 74215.1092 | 108097.709 | 67304.1042 | 68677.4982 | 77631.5666 | 84514.8266 | 69819.5172 | 102133.6   |
| 382 | Massoniresinol; Vladinol A                                                           | C20H24O8  | Lignans and Coumarins | Lignans           | 96087-10-4  | 391.14   | 59.01    | 392.1471 | [M-H] <sup>-</sup>   | 91635.1375 | 140956.368 | 74919.9532 | 111517.366 | 91035.3922 | 87752.6899 | 97921.889  | 65534.158  | 87168.933  |
| 383 | 4-Hydroxycoumarin                                                                    | C9H6O3    | Lignans and Coumarins | Coumarins         | 1076-38-6   | 161.02   | 117.03   | 162.0317 | [M-H] <sup>-</sup>   | 59594.6739 | 52766.474  | 49260.9932 | 51125.9417 | 60487.1076 | 64637.2961 | 67608.3063 | 78079.7052 | 74298.4726 |
| 384 | Erythro-Guaiacylglycerol-β-dihydroconiferyl Ether glucoside                          | C26H36O12 | Lignans and Coumarins | Lignans           | -           | 539.21   | 491.19   | 540.2207 | [M-H] <sup>-</sup>   | 85785.5505 | 87455.5182 | 71500.9501 | 50974.9422 | 84924.9907 | 66467.28   | 70069.5202 | 68602.9907 | 78856.5545 |
| 385 | Dihydrodehydroconiferyl alcohol-4-O-glucoside*                                       | C26H34O11 | Lignans and Coumarins | Lignans           | -           | 521.2    | 359.15   | 522.2101 | [M-H] <sup>-</sup>   | 77407.4538 | 93142.9406 | 72829.6244 | 57867.6501 | 60022.7057 | 56349.3853 | 62987.3579 | 66336.1499 | 75838.7627 |
| 386 | Isolariciresinol-9'-O-glucoside*                                                     | C26H34O11 | Lignans and Coumarins | Lignans           | 63358-12-3  | 521.2    | 359.15   | 522.2101 | [M-H] <sup>-</sup>   | 66742.1135 | 54634.4018 | 66657.6603 | 64453.8357 | 67918.0413 | 69004.0608 | 62295.5204 | 62155.6774 | 62001.6495 |
| 387 | Sesamol                                                                              | C7H6O3    | Lignans and Coumarins | Lignans           | 533-31-3    | 139.04   | 98.98    | 138.0317 | [M+H] <sup>+</sup>   | 62649.7625 | 45473.5437 | 72369.7826 | 44492.9144 | 57268.6556 | 47924.1594 | 53354.2354 | 55084.7843 | 62513.148  |
| 388 | 3,4-Dihydro-4-(4'-hydroxyphenyl)-5,7-dihydrocoumarin glucoside*                      | C21H22O10 | Lignans and Coumarins | Coumarins         | -           | 435.13   | 273.08   | 434.1208 | [M+H] <sup>+</sup>   | 58356.5293 | 60707.8034 | 82184.7907 | 137703.701 | 74944.8678 | 66869.5152 | 48984.923  | 52310.7876 | 56328.3826 |
| 389 | Skimmin (7-Hydroxycoumarin-7-O-glucoside)                                            | C15H16O8  | Lignans and Coumarins | Coumarins         | 93-39-0     | 325.09   | 163.04   | 324.0845 | [M+H] <sup>+</sup>   | 48858.4995 | 60032.7253 | 86980.5373 | 58797.3083 | 64693.2014 | 68121.0983 | 49756.0951 | 57947.3552 | 47188.9947 |
| 390 | Erythro-Guaiacylglycerol-β-dihydroconiferyl Ether*                                   | C20H26O7  | Lignans and Coumarins | Lignans           | 135820-77-8 | 377.16   | 329.14   | 378.1679 | [M-H] <sup>-</sup>   | 35568.5104 | 34830.5422 | 34013.2075 | 30592.3454 | 30005.4166 | 37049.3411 | 29814.1128 | 48821.3952 | 30308.1895 |
| 391 | Daphnetin                                                                            | C9H6O4    | Lignans and Coumarins | Coumarins         | 486-35-1    | 177.02   | 121.03   | 178.0266 | [M-H] <sup>-</sup>   | 43565.7587 | 33272.1891 | 26515.1706 | 29689.7064 | 37644.8258 | 29918.0544 | 32922.544  | 26982.0089 | 26935.6639 |
| 392 | Sesamin                                                                              | C20H18O6  | Lignans and Coumarins | Lignans           | 607-80-7    | 355.1    | 163.04   | 354.1103 | [M+H] <sup>+</sup>   | 30225.1097 | 10788.871  | 29473.0803 | 22645.386  | 34290.0128 | 33388.8161 | 42205.6819 | 17030.6045 | 25149.379  |
| 393 | Secosolariciresinol 4-O-glucoside                                                    | C26H36O11 | Lignans and Coumarins | Lignans           | -           | 523.22   | 361.14   | 524.2258 | [M-H] <sup>-</sup>   | 22009.7548 | 30317.3622 | 28388.7353 | 27970.2312 | 31942.3569 | 23115.0018 | 36271.0974 | 24191.1337 | 22935.596  |
| 394 | Demethyl-erythro-Guaiacylglycerol β-Sinapyl Ether                                    | C20H24O8  | Lignans and Coumarins | Lignans           | -           | 391.14   | 343.12   | 392.1471 | [M-H] <sup>-</sup>   | 30663.7843 | 19759.9235 | 20437.5922 | 21042.5192 | 34248.8466 | 23130.4708 | 23872.8192 | 29384.7219 | 18262.0405 |
| 395 | Epipinoresinol*                                                                      | C20H22O6  | Lignans and Coumarins | Lignans           | 24404-50-0  | 357.1344 | 151.0442 | 358.1416 | [M-H] <sup>-</sup>   | 10752.0317 | 19723.0419 | 15164.1372 | 15148.6686 | 15074.9625 | 19036.8515 | 20164.4152 | 20919.5217 | 19662.1938 |
| 396 | Scopoletin-7-O-glucoside (Scopolin)                                                  | C16H18O9  | Lignans and Coumarins | Coumarins         | 531-44-2    | 355.1    | 193.05   | 354.0951 | [M+H] <sup>+</sup>   | 17471.3118 | 21654.0461 | 13495.1185 | 30559.9382 | 22547.2285 | 13272.9815 | 14646.7055 | 21148.3037 | 23921.7239 |
| 397 | 1-Hydroxypinoresinol-1-O-Glucoside                                                   | C26H32O12 | Lignans and Coumarins | Lignans           | 81495-71-8  | 535.18   | 373.13   | 536.1894 | [M-H] <sup>-</sup>   | 12693.9279 | 15181.1415 | 14686.3068 | 9950.31484 | 10028.9393 | 11729.0385 | 21161.6468 | 14872.9586 | 23426.0647 |
| 398 | Esculetin-7-O-quinic acid                                                            | C16H16O9  | Lignans and Coumarins | Coumarins         | -           | 351.07   | 105.1    | 352.0794 | [M-H] <sup>-</sup>   | 19356.4251 | 20560.1549 | 23124.5459 | 13242.8158 | 17489.6799 | 17088.0701 | 16190.8347 | 21865.5005 | 17897.3332 |
| 399 | Matairesinol-4'-O-glucoside (Matairesinoid)                                          | C26H32O11 | Lignans and Coumarins | Lignans           | 23202-85-9  | 538.23   | 359.15   | 520.1945 | [M+NH4] <sup>+</sup> | 8785.30555 | 21711.7421 | 26006.5309 | 31372.1591 | 14414.4886 | 9783.0458  | 16503.2086 | 23446.8867 | 15945.2282 |
| 400 | Pinoresinol*                                                                         | C20H22O6  | Lignans and Coumarins | Lignans           | 487-36-5    | 357.13   | 151.04   | 358.1416 | [M-H] <sup>-</sup>   | 18077.7977 | 15863.405  | 16180.1862 | 18046.3724 | 13049.9606 | 16661.248  | 17110.9103 | 18609.0867 | 16312.0907 |
| 401 | 7R,8S-erythro-3',4,9,9'-tetrahydroxy-3-methoxy-8-O-4'-neolignan-7-O-glucopyranoside, | C25H34O12 | Lignans and Coumarins | Lignans           | -           | 525.2    | 179.07   | 526.205  | [M-H] <sup>-</sup>   | 8318.10185 | 13923.6602 | 21998.0897 | 19747.9438 | 5906.80871 | 8332.35305 | 18461.6879 | 20591.4632 | 10476.6712 |
| 402 | Secosolariciresinol-9'-O-glucoside                                                   | C26H36O11 | Lignans and Coumarins | Lignans           | 63320-67-2  | 523.22   | 475.2    | 524.2258 | [M-H] <sup>-</sup>   | 11817.546  | 9936.83465 | 10074.2947 | 15199.4268 | 11552.6447 | 11722.8734 | 10960.2314 | 11128.6967 | 4285.4874  |
| 403 | dihydrodehydroconiferyl alcohol-9-O-β-D-glucopyranoside                              | C26H34O11 | Lignans and Coumarins | Lignans           | -           | 521.2    | 491.19   | 522.2101 | [M-H] <sup>-</sup>   | 4954.10082 | 14146.7918 | 6752.07499 | 8827.68773 | 8929.54933 | 10234.1273 | 10858.9051 | 1759.40207 | 10193.601  |
| 404 | Procyanidin B1*                                                                      | C30H26O12 | Tannins               | Proanthocyanidins | 20315-25-7  | 577.14   | 425.09   | 578.1424 | [M-H] <sup>-</sup>   | 86689.6959 | 70753.0391 | 74523.5745 | 70469.1228 | 71321.4145 | 76719.3374 | 53583.186  | 55881.7932 | 69285.4373 |
| 405 | Gambirin A1                                                                          | C30H28O12 | Tannins               | Tannin            | 76250-49-2  | 581.17   | 139.04   | 580.1581 | [M+H] <sup>+</sup>   | 9          | 9          | 9          | 9          | 9          | 9          | 34956.7798 | 23536.8073 | 30023.7983 |
| 406 | Procyanidin B3*                                                                      | C30H26O12 | Tannins               | Proanthocyanidins | 23567-23-9  | 577.14   | 407.08   | 578.1424 | [M-H] <sup>-</sup>   | 24480.2633 | 26649.7362 | 16454.0329 | 24251.4269 | 27186.7795 | 26849.2437 | 24829.6116 | 18224.4591 | 39452.9479 |
| 407 | Procyanidin B2*                                                                      | C30H26O12 | Tannins               | Proanthocyanidins | 29106-49-8  | 577.14   | 407.08   | 578.1424 | [M-H] <sup>-</sup>   | 25649.1197 | 17561.2106 | 21660.2535 | 14371.6035 | 25110.8173 | 23285.3998 | 22147.1522 | 18949.4899 | 15964.0912 |
| 408 | Phyllanemblinin B*                                                                   | C27H22O18 | Tannins               | Tannin            | -           | 633.07   | 301      | 634.0806 | [M-H] <sup>-</sup>   | 8228.33313 | 10144.7116 | 4957.65349 | 11335.123  | 9608.50834 | 20853.7047 | 17502.7289 | 12221.9424 | 27312.6636 |
| 409 | Theaflagin                                                                           | C20H16O9  | Tannins               | Tannin            | 102208-15-1 | 399.07   | 233.05   | 400.0794 | [M-H] <sup>-</sup>   | 10036.9678 | 16237.7003 | 7088.75091 | 20454.4768 | 10633.7923 | 15533.7487 | 12488.2827 | 18918.9215 | 16063.1133 |
| 410 | Isoorientagin*                                                                       | C27H22O18 | Tannins               | Tannin            | -           | 633.07   | 301      | 634.0806 | [M-H] <sup>-</sup>   | 4255.37907 | 3922.46236 | 3551.18054 | 9879.03539 | 14502.6115 | 8380.65647 | 11952.7554 | 14023.8439 | 17925.1421 |
| 411 | Sanguin H4*                                                                          | C27H22O18 | Tannins               | Tannin            | 84316-77-8  | 633.08   | 301.01   | 634.0806 | [M-H] <sup>-</sup>   | 5097.25785 | 6220.95764 | 3804.25985 | 22261.6594 | 16545.0294 | 11720.4504 | 11627.5596 | 14629.2568 | 17116.5867 |

\* represents the presence of an isomer of the compound.
