# Supplementary material for: Macronutrient digestion and polyphenol bioaccessibility in oat milk tea products: an in vitro gastrointestinal tract study
Source: Royal Society of Chemistry journal article supplement (doi:10.1039/d4fo01439a), 2024-01-01
Supplement: d4fo01439a3.pdf [file d4fo01439a3.pdf]

**Table. S2. The detail data for 182 differential phenolic compounds.**

| No. | Compounds                                                                                                        | Formula   | Class I        | Class II         | CAS        | Q1 (Da)  | Q3 (Da)  | Molecular weight (Da) | Ionization model | LF-OMTMS-D-1 | LF-OMTMS-D-2 | LF-OMTMS-D-3 | MF-OMTMS-D-1 | MF-OMTMS-D-2 | MF-OMTMS-D-3 | HF-OMTMS-D-1 | HF-OMTMS-D-2 | HF-OMTMS-D-3 |
|-----|------------------------------------------------------------------------------------------------------------------|-----------|----------------|------------------|------------|----------|----------|-----------------------|------------------|--------------|--------------|--------------|--------------|--------------|--------------|--------------|--------------|--------------|
| 1   | 2-Hydroxycinnamic acid*                                                                                          | C9H8O3    | Phenolic acids | Phenolic acids   | 583-17-5   | 163.04   | 119.05   | 164.0473              | [M-H]-           | 11702959.91  | 10889151.07  | 10546548.99  | 10235525.01  | 10080350.25  | 10128075.34  | 14582851.41  | 14189657.67  | 13865588.72  |
| 2   | o-Hydroxycinnamic Acid*                                                                                          | C9H8O3    | Phenolic acids | Phenolic acids   | 5801-57-0  | 163.0401 | 119.0502 | 164.0473              | [M-H]-           | 11484080.06  | 11357105.46  | 11321427.88  | 10374426.49  | 10119731.41  | 10238949.74  | 13246908.51  | 14873876.26  | 14013284.83  |
| 3   | 3-Hydroxycinnamic Acid*                                                                                          | C9H8O3    | Phenolic acids | Phenolic acids   | 14755-02-3 | 163.04   | 119.05   | 164.0473              | [M-H]-           | 10174947.87  | 11073831.66  | 10269587.45  | 9745958.583  | 9401503.949  | 9845393.457  | 13637118.31  | 14054314.88  | 14139235.02  |
| 4   | 4-O-Methylgallic Acid                                                                                            | C8H8O5    | Phenolic acids | Phenolic acids   | 4319-02-2  | 183.03   | 124.02   | 184.0372              | [M-H]-           | 1908573.421  | 2230906.264  | 2075349.382  | 5283832.107  | 4507638.312  | 5285518.212  | 9004367.925  | 9663017.166  | 11061022.2   |
| 5   | Apigenin-6-C-glucoside (Isovitexin)*                                                                             | C21H20O10 | Flavonoids     | Flavones         | 38953-85-4 | 431.1    | 311.05   | 432.1056              | [M-H]-           | 5836585.113  | 5792391.388  | 5209346.866  | 6884193.757  | 6177770.945  | 6488187.084  | 8853498.122  | 7226531.136  | 11557314.4   |
| 6   | Methyl gallate                                                                                                   | C8H8O5    | Phenolic acids | Phenolic acids   | 99-24-1    | 183.03   | 124.02   | 184.0372              | [M-H]-           | 1639766.932  | 1845745.969  | 1861219.299  | 4596875.122  | 4004415.44   | 4460316.516  | 7442354.241  | 7909577.23   | 9224934.066  |
| 7   | 3-O-p-Coumaroylquinic acid                                                                                       | C16H18O8  | Phenolic acids | Phenolic acids   | 87099-71-6 | 337.09   | 191.06   | 338.1002              | [M-H]-           | 6870805.247  | 7136648.591  | 7047089.743  | 7362037.142  | 6657524.436  | 7202262.834  | 7223062.972  | 7745198.68   | 7798558.153  |
| 8   | Vitexin-2"-O-rhamnoside                                                                                          | C27H30O14 | Flavonoids     | Flavones         | 64820-99-1 | 579.17   | 433.11   | 578.1636              | [M+H]+           | 6478980.529  | 6523577.615  | 6053909.258  | 5453621.916  | 5644332.482  | 6335858.898  | 7182740.918  | 6940084.904  | 7422218.681  |
| 9   | 4-(3,4,5-Trihydroxybenzoyl)benzoic acid                                                                          | C14H10O7  | Phenolic acids | Phenolic acids   | -          | 289.04   | 137.02   | 290.0427              | [M-H]-           | 7082310.227  | 6764209.511  | 5080971.72   | 5453492.898  | 4743469.838  | 5147226.727  | 6505821.728  | 4972151.239  | 7055673.611  |
| 10  | Apigenin-8-C-Glucoside (Vitexin)*                                                                                | C21H20O10 | Flavonoids     | Flavones         | 3681-93-4  | 433.11   | 313.07   | 432.1056              | [M+H]+           | 3794268.406  | 3481811.68   | 3517331.347  | 4316052.214  | 4284778.885  | 4492679.192  | 5491907.581  | 5786141.901  | 6810794.544  |
| 11  | Ferulic acid*                                                                                                    | C10H10O4  | Phenolic acids | Phenolic acids   | 537-98-4   | 193.05   | 134.04   | 194.0579              | [M-H]-           | 4534444.843  | 4191517.323  | 4261634.129  | 4844286.077  | 4437516.706  | 4424536.866  | 5229883.196  | 5090616.607  | 5126196.415  |
| 12  | Quercetin-3-O-glucoside (Isoquercitrin)*                                                                         | C21H20O12 | Flavonoids     | Flavonols        | 482-35-9   | 463.09   | 300.03   | 464.0955              | [M-H]-           | 421057.3125  | 446645.4701  | 263769.876   | 1212120.92   | 1032665.445  | 1402252.605  | 3713237.528  | 3512582.88   | 4708750.8    |
| 13  | 4-Hydroxybenzoic acid                                                                                            | C7H6O3    | Phenolic acids | Phenolic acids   | 99-96-7    | 137.02   | 93.03    | 138.0317              | [M-H]-           | 3058025.608  | 3159386.159  | 2923961.223  | 3072831.121  | 3158008.416  | 3072402.471  | 3833794.247  | 3770062.884  | 3722624.21   |
| 14  | Kaempferol-3-O-robinobioside(Biorobin)                                                                           | C27H30O15 | Flavonoids     | Flavonols        | 17297-56-2 | 593.15   | 285.04   | 594.1585              | [M-H]-           | 1860308.542  | 1763558.848  | 1254703.279  | 2294989.148  | 2186037.007  | 1879017.57   | 2982260.307  | 3097500.8    | 3858842.346  |
| 15  | Quercetin-4"-O-glucoside (Spiraeoside)*                                                                          | C21H20O12 | Flavonoids     | Flavonols        | 20229-56-5 | 463.09   | 301.04   | 464.0955              | [M-H]-           | 450519.0918  | 426162.9262  | 320578.5502  | 1018447.344  | 1006256.02   | 1102172.195  | 2888189.869  | 2889136.475  | 4055777.684  |
| 16  | Hesperetin-5-O-glucoside                                                                                         | C22H24O11 | Flavonoids     | Flavanones       | 69651-80-5 | 463.12   | 301.07   | 464.1319              | [M-H]-           | 455748.5305  | 529312.3465  | 341796.5481  | 1028142.431  | 1008044.133  | 1111913.27   | 2688568.486  | 2834596.685  | 3880118.995  |
| 17  | 2,5-Dihydroxybenzaldehyde                                                                                        | C7H6O3    | Phenolic acids | Phenolic acids   | 1194-98-5  | 137.02   | 93.03    | 138.0317              | [M-H]-           | 2413115.606  | 2532170.59   | 2251703.092  | 2452020.852  | 2471300.128  | 2458317.07   | 2925034.734  | 3097795.715  | 2946586.781  |
| 18  | Isoferulic Acid*                                                                                                 | C10H10O4  | Phenolic acids | Phenolic acids   | 25522-33-2 | 193.0506 | 134.0374 | 194.0579              | [M-H]-           | 2701623.193  | 2461465.16   | 2555785.234  | 2578774.794  | 2637701.7    | 2733818.271  | 3075105.33   | 3018062.222  | 2821667.402  |
| 19  | Quercetin-7-O-glucoside*                                                                                         | C21H20O12 | Flavonoids     | Flavonols        | 491-50-9   | 463.09   | 301.04   | 464.0955              | [M-H]-           | 452057.8223  | 445017.2715  | 272312.8923  | 892933.8428  | 826908.1242  | 1180745.701  | 2491273.464  | 2507147.374  | 3691012.633  |
| 20  | Quercetin 3-xylosyl-(1->6)-glucoside                                                                             | C26H28O16 | Flavonoids     | Flavones         | -          | 595.14   | 134.05   | 596.1377351           | [M-H]-           | 1371754.409  | 1081944.862  | 1340157.665  | 1415160.404  | 1304481.213  | 1440066.331  | 2511555.3    | 2572278.209  | 2210860.429  |
| 21  | 2-(Formylamino)benzoic acid                                                                                      | C8H7NO3   | Phenolic acids | Phenolic acids   | 3342-77-6  | 164.04   | 120.05   | 165.0426              | [M-H]-           | 1971785.84   | 1763745.506  | 1824241.347  | 1692164.878  | 1685718.672  | 1604513.065  | 2198784.789  | 2211278.273  | 2126756.075  |
| 22  | Gallocatechin 3-O-gallate*                                                                                       | C22H18O11 | Flavonoids     | Flavanols        | 5127-64-0  | 457.08   | 169.01   | 458.0849              | [M-H]-           | 1341849.05   | 803428.1356  | 888131.1664  | 2267294.219  | 1977962.238  | 2014408.232  | 1943235.249  | 2155624.372  | 2045512.915  |
| 23  | Kaempferol-7-O-glucoside*                                                                                        | C21H20O11 | Flavonoids     | Flavonols        | 16290-07-6 | 447.09   | 285.04   | 448.1006              | [M-H]-           | 303188.1763  | 305734.892   | 247274.8191  | 698574.8005  | 638674.174   | 732649.0023  | 1596767.784  | 1743625.479  | 2301864.763  |
| 24  | Kaempferol-3-O-galactoside (Trifolin)*                                                                           | C21H20O11 | Flavonoids     | Flavonols        | 23627-87-4 | 447.09   | 285.04   | 448.1006              | [M-H]-           | 321004.4791  | 305908.5747  | 213722.3932  | 686313.4164  | 615340.7377  | 761976.3922  | 1627863.714  | 1528297.638  | 2264533.452  |
| 25  | Quercetin-3-O-robinobioside                                                                                      | C27H30O16 | Flavonoids     | Flavonols        | 52525-35-6 | 609.15   | 300.03   | 610.1534              | [M-H]-           | 678256.8762  | 726892.2116  | 541386.5697  | 840664.0607  | 779403.8788  | 916269.3724  | 1397347.771  | 1415233.339  | 1511621.386  |
| 26  | Kaempferol-3-O-glucoside (Astragalin)*                                                                           | C21H20O11 | Flavonoids     | Flavonols        | 480-10-4   | 449.1078 | 287.0553 | 448.1006              | [M+H]+           | 927220.2704  | 840695.1677  | 751285.0061  | 840198.244   | 837901.1097  | 872426.2122  | 633001.8379  | 1456413.655  | 1918861.665  |
| 27  | Quercetin-3-O-rutinoside (Rutin)                                                                                 | C27H30O16 | Flavonoids     | Flavonols        | 153-18-4   | 609.15   | 301.04   | 610.1534              | [M-H]-           | 572950.0118  | 490353.2117  | 391357.2034  | 771459.5191  | 645255.7237  | 602315.4626  | 1041467.817  | 1008284.223  | 1302361.866  |
| 28  | Methyl cumalate*                                                                                                 | C7H6O4    | Phenolic acids | Phenolic acids   | 6018-41-3  | 153.02   | 109.03   | 154.0266              | [M-H]-           | 1445859.237  | 1231188.111  | 1251315.113  | 1250822.75   | 1216791.509  | 1318675.715  | 1096351.338  | 1144797.722  | 1103544.467  |
| 29  | Taxifolin-3"-O-glucoside*                                                                                        | C21H22O12 | Flavonoids     | Flavanonols      | 31106-05-5 | 465.13   | 303.05   | 466.1111              | [M-H]-           | 633476.852   | 542042.6919  | 537202.3553  | 672062.5945  | 651898.2326  | 760872.7293  | 1017922.157  | 997527.9226  | 1114865.465  |
| 30  | 1,8-dihydroxy-4,5-dimethoxy-3-[[[(2s,3r,4s,5r,6r)-3,4,5-trihydroxy-6-(hydroxymethyl)oxan-2-yl]oxy]xanthen-9-one* | C21H22O12 | Flavonoids     | Other Flavonoids | -          | 465.1    | 303.05   | 466.1111              | [M-H]-           | 566317.3735  | 593562.0845  | 564520.9546  | 741938.24    | 660482.9319  | 633920.9775  | 999574.5407  | 807933.5974  | 1154453.699  |
| 31  | Isovitexin-2"-O-rhamnoside                                                                                       | C27H30O14 | Flavonoids     | Flavones         | -          | 579.17   | 313.07   | 578.1636              | [M+H]+           | 866414.1311  | 898738.2216  | 1010474.562  | 850749.4656  | 953400.3837  | 884558.0493  | 968164.9556  | 981412.8825  | 961340.8445  |
| 32  | Quercetin-5-O-β-D-glucoside*                                                                                     | C21H20O12 | Flavonoids     | Flavonols        | -          | 465.1    | 303.05   | 464.0955              | [M+H]+           | 45547.11298  | 223357.7463  | 52420.86542  | 51853.607    | 261755.79    | 119535.9766  | 1223228.621  | 462232.8572  | 1005375.811  |
| 33  | 3,4,2',4',6'-Pentahydroxychalcone                                                                                | C15H12O6  | Flavonoids     | Chalcones        | 73692-51-0 | 289.07   | 163.04   | 288.0634              | [M+H]+           | 1001597.456  | 873981.2431  | 636644.3722  | 501899.3685  | 555207.9968  | 602992.7323  | 923575.8825  | 829700.2517  | 855243.3493  |
| 34  | Glucosyringic acid                                                                                               | C15H20O10 | Phenolic acids | Phenolic acids   | 33228-65-8 | 359.1    | 197.05   | 361.1129              | [M-H]-           | 381272.4814  | 400952.6625  | 418414.8091  | 541639.5343  | 641514.2469  | 581905.8677  | 871079.1118  | 879989.9231  | 842525.0614  |
| 35  | 4-Nitrophenol                                                                                                    | C6H5NO3   | Phenolic acids | Phenolic acids   | 100-02-7   | 140.03   | 98.96    | 139.0269              | [M+H]+           | 13075656.93  | 12180580.03  | 12042611.08  | 1373444.527  | 1607729.138  | 1652747.624  | 739515.9023  | 697427.5453  | 1039870.076  |
| 36  | Isoaonarin(Isovitexin-4"-O-glucoside)                                                                            | C27H30O15 | Flavonoids     | Flavones         | 19416-87-6 | 595.17   | 313.07   | 594.1585              | [M+H]+           | 711597.2055  | 694321.3     | 738377.3398  | 663937.0954  | 603569.8477  | 723885.3651  | 726034.9156  | 821342.2332  | 768824.3028  |
| 37  | Phloroglucinol; 1,3,5-Benzenetriol                                                                               | C6H6O3    | Phenolic acids | Phenolic acids   | 108-73-6   | 127.04   | 81.03    | 126.0317              | [M+H]+           | 714628.6371  | 627568.5981  | 787268.9673  | 594816.0202  | 433908.2055  | 609273.3534  | 604966.6307  | 642249.3541  | 888436.5116  |
| 38  | Naringenin-4"-O-glucoside*                                                                                       | C21H22O10 | Flavonoids     | Flavanones       | -          | 433.12   | 271.06   | 434.1213              | [M-H]-           | 520345.8621  | 502233.9713  | 538413.5823  | 641616.5958  | 573160.3983  | 597089.0999  | 634969.7123  | 726860.1215  | 762040.6865  |
| 39  | Quercetin-3-O-galactoside (Hypertin)*                                                                            | C21H20O12 | Flavonoids     | Flavonols        | 482-36-0   | 465.1    | 303.06   | 464.0955              | [M+H]+           | 47752.06767  | 87093.34587  | 103810.8887  | 97602.44124  | 187106.5171  | 341454.7604  | 570531.5     | 539067.6548  | 993533.2225  |
| 40  | Isohyperoside*                                                                                                   | C21H20O12 | Flavonoids     | Flavonols        | 35589-21-0 | 465.1019 | 303.0613 | 464.0955              | [M+H]+           | 47752.06767  | 87093.34587  | 103810.8887  | 97602.44124  | 187106.5171  | 341454.7604  | 570531.5     | 539067.6548  | 993533.2225  |

|    |                                                             |            |                       |                  |             |        |        |          |                    |             |             |             |             |             |             |             |             |             |
|----|-------------------------------------------------------------|------------|-----------------------|------------------|-------------|--------|--------|----------|--------------------|-------------|-------------|-------------|-------------|-------------|-------------|-------------|-------------|-------------|
| 41 | Tricin-7-O-Glucoside*                                       | C23H24O12  | Flavonoids            | Flavones         | 32769-01-0  | 493.13 | 331.08 | 492.1268 | [M+H] <sup>+</sup> | 372456.8654 | 295201.5754 | 229996.4499 | 356320.8325 | 366148.6047 | 428503.2407 | 606027.9315 | 600641.8807 | 893746.1    |
| 42 | Apigenin-6,8-di-C-arabinoside*                              | C25H26O13  | Flavonoids            | Flavones         | -           | 535.14 | 499.12 | 534.1373 | [M+H] <sup>+</sup> | 280789.0275 | 232218.0818 | 237742.0663 | 331725.1579 | 278345.8864 | 366898.8769 | 591020.4569 | 747719.4674 | 706862.4139 |
| 43 | 4-O-p-Coumaroylquinic acid                                  | C16H18O8   | Phenolic acids        | Phenolic acids   | 32451-86-8  | 337.09 | 163.04 | 338.1002 | [M-H] <sup>-</sup> | 594097.9453 | 595002.8565 | 529494.0693 | 568103.9602 | 549829.136  | 563676.0524 | 641283.8143 | 616842.4848 | 640149.225  |
| 44 | Eugenol                                                     | C10H12O2   | Phenolic acids        | Phenolic acids   | 97-53-0     | 165.09 | 91.05  | 164.0837 | [M+H] <sup>+</sup> | 702101.0474 | 555971.1372 | 881084.6121 | 492526.1095 | 385616.4785 | 519423.3071 | 581867.1022 | 706318.5705 | 586444.5111 |
| 45 | 2,6-Di-tert-butylphenol*                                    | C14H22O    | Phenolic acids        | Phenolic acids   | 128-39-2    | 205.16 | 189.13 | 206.1671 | [M-H] <sup>-</sup> | 589965.3892 | 724764.1943 | 799790.5017 | 726001.2772 | 740009.9893 | 793488.4455 | 639362.1297 | 681931.1389 | 519784.4175 |
| 46 | Apigenin-6-C-arabinoside-8-C-xyloside*                      | C25H26O13  | Flavonoids            | Flavones         | -           | 535.14 | 499.12 | 534.1373 | [M+H] <sup>+</sup> | 233154.2938 | 200923.3562 | 142325.8556 | 318267.0608 | 297703.0438 | 291924.2174 | 558817.0455 | 544011.435  | 722476.6523 |
| 47 | Sinapic acid                                                | C11H12O5   | Phenolic acids        | Phenolic acids   | 530-59-6    | 223.06 | 193.02 | 224.0685 | [M-H] <sup>-</sup> | 67682.48814 | 51625.14255 | 70575.75446 | 847206.3828 | 822014.4629 | 775020.9797 | 601498.424  | 571260.099  | 582672.9422 |
| 48 | 6-O-Caffeoyl-D-glucose*                                     | C15H18O9   | Phenolic acids        | Phenolic acids   | -           | 341.09 | 179.03 | 342.0951 | [M-H] <sup>-</sup> | 426442.3233 | 483655.1852 | 468934.7944 | 530510.6715 | 496104.3698 | 470269.325  | 581614.9596 | 550035.345  | 607033.544  |
| 49 | 1-O-Sinapoyl-β-D-glucose                                    | C17H22O10  | Phenolic acids        | Phenolic acids   | -           | 385.11 | 223.06 | 386.1213 | [M-H] <sup>-</sup> | 212109.3884 | 199120.1523 | 167958.93   | 441696.2147 | 403300.4113 | 361277.3475 | 531168.1501 | 568670.9248 | 598515.1257 |
| 50 | Jacocidin-7-O-Glucoside*                                    | C23H24O12  | Flavonoids            | Flavones         | 25474-11-7  | 493.14 | 331.08 | 492.1268 | [M+H] <sup>+</sup> | 312085.0755 | 291704.1381 | 204325.9934 | 300853.5019 | 343062.7519 | 412460.939  | 525550.4974 | 458339.8474 | 705757.6328 |
| 51 | Syringic acid                                               | C9H10O5    | Phenolic acids        | Phenolic acids   | 530-57-4    | 197.05 | 123.01 | 198.0528 | [M-H] <sup>-</sup> | 409717.7741 | 414310.7051 | 372650.6168 | 407886.454  | 423712.7145 | 433542.506  | 571926.813  | 584438.3885 | 509473.4454 |
| 52 | Isoschaftoside                                              | C26H28O14  | Flavonoids            | Flavones         | 52012-29-0  | 565.16 | 409.09 | 564.1479 | [M+H] <sup>+</sup> | 530183.4033 | 465530.1378 | 385933.6461 | 456993.6718 | 464112.6494 | 504119.3885 | 495918.9314 | 530111.7263 | 622044.9718 |
| 53 | 4-O-Glucosyl-sinapate                                       | C17H22O10  | Phenolic acids        | Phenolic acids   | -           | 385.11 | 223.06 | 386.1213 | [M-H] <sup>-</sup> | 233971.3922 | 217114.8681 | 158441.556  | 392183.1772 | 411381.0415 | 365319.0012 | 553757.6775 | 530453.5063 | 530171.0729 |
| 54 | Dihydrokaempferide                                          | C16H14O6   | Flavonoids            | Flavanols        | 137225-59-3 | 303.09 | 229.08 | 302.079  | [M+H] <sup>+</sup> | 117396.4991 | 103089.2138 | 46845.31469 | 182132.7058 | 204947.1616 | 216551.2701 | 405379.4326 | 479405.1076 | 667434.7195 |
| 55 | Chlorogenic acid (3-O-Caffeoylquinic acid)*                 | C16H18O9   | Phenolic acids        | Phenolic acids   | 327-97-9    | 353.09 | 191.06 | 354.0951 | [M-H] <sup>-</sup> | 425723.4835 | 428685.6995 | 397611.491  | 435013.4195 | 454706.575  | 472680.784  | 524869.9    | 529585.91   | 485296.996  |
| 56 | 5-Glucosyloxy-2-Hydroxybenzoic acid methyl ester            | C14H18O9   | Phenolic acids        | Phenolic acids   | -           | 329.09 | 167.04 | 330.0951 | [M-H] <sup>-</sup> | 399557.9571 | 509168.9866 | 530107.065  | 450931.7071 | 380126.0164 | 413365.0807 | 470831.7024 | 490936.8683 | 474591.3819 |
| 57 | Chrysoeriol-5-O-glucoside                                   | C22H22O11  | Flavonoids            | Flavones         | -           | 461.11 | 299.1  | 462.1162 | [M-H] <sup>-</sup> | 83106.05874 | 77629.90277 | 66624.51389 | 175186.7034 | 142297.0161 | 183497.4597 | 414026.9235 | 412310.0323 | 508464.3138 |
| 58 | Methyl 4-hydroxybenzoate*                                   | C8H8O3     | Phenolic acids        | Phenolic acids   | 99-76-3     | 151.04 | 136.02 | 152.0473 | [M-H] <sup>-</sup> | 435647.5725 | 427823.4141 | 448080.7123 | 407686.8258 | 437846.544  | 406886.352  | 427137.7529 | 476159.3179 | 424049.1179 |
| 59 | 1,2,3,7,8-pentahydroxy-6-methylanthracene-9,10-dione        | C15H10O7   | Flavonoids            | Other Flavonoids | -           | 303.05 | 229.05 | 302.0427 | [M+H] <sup>+</sup> | 99831.91006 | 85280.92514 | 51441.51141 | 133382.1234 | 80641.88506 | 133614.9418 | 340836.461  | 355545.1554 | 609335.1946 |
| 60 | 1,2,4,5-tetrahydroxy-7-(hydroxymethyl)anthracene-9,10-dione | C15H10O7   | Flavonoids            | Other Flavonoids | -           | 303.05 | 229.05 | 302.0427 | [M+H] <sup>+</sup> | 140537.6458 | 139785.9018 | 118658.3103 | 178106.8336 | 149577.533  | 192621.7641 | 364150.8113 | 338671.7384 | 540749.4435 |
| 61 | 5-O-Galloyl-D-hamamelose*                                   | C13H16O10  | Phenolic acids        | Phenolic acids   | -           | 331.07 | 169.02 | 332.0743 | [M-H] <sup>-</sup> | 342493.7268 | 324260.7527 | 317027.4365 | 362328.6692 | 331714.9459 | 342211.3882 | 354761.7073 | 374990.155  | 397033.8967 |
| 62 | 1-O-Galloyl-β-D-glucose*                                    | C13H16O10  | Phenolic acids        | Phenolic acids   | 58511-73-2  | 331.07 | 169.01 | 332.0743 | [M-H] <sup>-</sup> | 326466.6362 | 336864.7696 | 340358.3545 | 332982.8666 | 314006.1704 | 332823.1574 | 347066.6183 | 386063.1996 | 375642.4875 |
| 63 | 6-O-Galloyl-β-D-glucose*                                    | C13H16O10  | Phenolic acids        | Phenolic acids   | 13186-19-1  | 331.07 | 169.01 | 332.0743 | [M-H] <sup>-</sup> | 326466.6362 | 336864.7696 | 340358.3545 | 332982.8666 | 314006.1704 | 332823.1574 | 347066.6183 | 386063.1996 | 375642.4875 |
| 64 | Digalloylgucose*                                            | C20H20O14  | Phenolic acids        | Phenolic acids   | -           | 483.08 | 169.05 | 484.0853 | [M-H] <sup>-</sup> | 317600.4884 | 235573.6248 | 252005.446  | 218704.1808 | 216840.6886 | 221537.9447 | 345324.2018 | 374360.009  | 357197.2231 |
| 65 | Isochlorogenic acid B*                                      | C25H24O12  | Phenolic acids        | Phenolic acids   | 14534-61-3  | 515.12 | 353.09 | 516.1268 | [M-H] <sup>-</sup> | 124007.0436 | 134100.5654 | 56395.96743 | 192667.0454 | 206357.3074 | 161357.1011 | 357945.0131 | 307172.0016 | 408684.1907 |
| 66 | Gallic Acid Ethyl Ester, Ethyl gallate                      | C9H10O5    | Phenolic acids        | Phenolic acids   | 831-61-8    | 197.05 | 124.02 | 198.0528 | [M-H] <sup>-</sup> | 296431.1525 | 272613.6378 | 248213.8879 | 295796.2288 | 293622.8538 | 292308.5249 | 347889.4552 | 345646.182  | 379644.345  |
| 67 | 3,4-Methyleneoxy cinnamyl alcohol                           | C10H10O3   | Lignans and Coumarins | Lignans          | 58095-76-4  | 177.06 | 117.04 | 178.063  | [M-H] <sup>-</sup> | 125055.8528 | 126325.8994 | 103579.5228 | 197410.5203 | 174732.5869 | 218860.6685 | 326126.5222 | 357601.9761 | 386924.0239 |
| 68 | 4-Hydroxyphenylacetic acid*                                 | C8H8O3     | Phenolic acids        | Phenolic acids   | 156-38-7    | 151.04 | 107.05 | 152.0473 | [M-H] <sup>-</sup> | 296546.0393 | 287452.4274 | 271771.9685 | 239057.1158 | 300712.939  | 289455.069  | 270789.1663 | 392226.9154 | 376726.934  |
| 69 | Dihydrochalcone-4'-O-glucoside                              | C21H24O10  | Flavonoids            | Chalcones        | -           | 435.13 | 273.08 | 436.1369 | [M-H] <sup>-</sup> | 137271.8177 | 183443.7869 | 160008.4037 | 228598.1918 | 200516.4637 | 187068.0024 | 313584.351  | 261320.753  | 390943.6986 |
| 70 | Propyl 4-hydroxybenzoate                                    | C10H12O3   | Phenolic acids        | Phenolic acids   | 94-13-3     | 179.07 | 92.03  | 180.0786 | [M-H] <sup>-</sup> | 128036.0214 | 191142.7618 | 182271.8531 | 175293.7682 | 142987.4588 | 166710.1544 | 322799.9869 | 303607.1665 | 332747.6995 |
| 71 | Phthalic acid                                               | C8H6O4     | Phenolic acids        | Phenolic acids   | 88-99-3     | 165.02 | 77.04  | 166.0266 | [M-H] <sup>-</sup> | 3513766.015 | 551707.2506 | 496446.6211 | 504460.4794 | 1402577.145 | 1339783.392 | 399007.3041 | 256740.8682 | 300455.9782 |
| 72 | Apigenin-6-C-xyloside-8-C-arabinoside                       | C25H26O13  | Flavonoids            | Flavones         | -           | 535.14 | 517.13 | 534.1373 | [M+H] <sup>+</sup> | 243352.2643 | 327854.0223 | 161821.33   | 297092.5924 | 74768.54362 | 214703.3266 | 274032.5297 | 332926.7787 | 348482.9812 |
| 73 | Myricetin-3-O-β-D-glucoside*                                | C21H20O13  | Flavonoids            | Flavonols        | 19833-12-6  | 481.1  | 319.04 | 480.0904 | [M+H] <sup>+</sup> | 45864.23631 | 20217.00177 | 36986.91338 | 48819.50458 | 61128.61538 | 121946.4145 | 222404.1311 | 169910.0773 | 555107.598  |
| 74 | Phloretin-2'-O-glucoside (Phlorizin)                        | C21H24O10  | Flavonoids            | Chalcones        | 60-81-1     | 435.13 | 167.04 | 436.1369 | [M-H] <sup>-</sup> | 140831.342  | 158222.2356 | 136766.8901 | 204430.1751 | 188087.7133 | 204755.0875 | 322098.3197 | 280008.7623 | 328650.6    |
| 75 | Sideretin (5,7,8-Trihydroxy-6-methoxycoumarin)              | C10H8O6    | Lignans and Coumarins | Coumarins        | -           | 223.03 | 149.03 | 224.0321 | [M-H] <sup>-</sup> | 34713.29687 | 21825.79021 | 39624.11524 | 371555.7966 | 482337.0147 | 357999.2904 | 263513.889  | 318065.9146 | 344403.1807 |
| 76 | Vanillin acetate                                            | C10H10O4   | Phenolic acids        | Phenolic acids   | 881-68-5    | 195.06 | 93.03  | 194.0579 | [M+H] <sup>+</sup> | 414192.878  | 374190.6257 | 367965.7056 | 348951.7829 | 425854.8287 | 392873.2813 | 322035.13   | 300259.3823 | 301584.0172 |
| 77 | 5,7-Dihydroxy-1(3H)-isobenzofuranone                        | C8H6O4     | Phenolic acids        | Phenolic acids   | 27979-58-4  | 165.02 | 121.03 | 166.0266 | [M-H] <sup>-</sup> | 1437920.024 | 380428.2158 | 384602.3163 | 363325.056  | 718302.7878 | 680936.6598 | 308320.4223 | 326658.7369 | 266560.3654 |
| 78 | Anthramilate-1-O-Sophoroside                                | C19H27NO12 | Phenolic acids        | Phenolic acids   | -           | 460.15 | 117.9  | 461.1533 | [M-H] <sup>-</sup> | 124537.0126 | 105402.5234 | 100106.2648 | 157796.9363 | 96979.70624 | 89077.3583  | 211831.4653 | 396056.0334 | 286404.0197 |
| 79 | 1,4-Di-O-Galloyl-D-glucose                                  | C20H20O14  | Phenolic acids        | Phenolic acids   | -           | 483.08 | 169.01 | 484.0853 | [M-H] <sup>-</sup> | 292582.1216 | 118251.6528 | 103792.3766 | 271386.3149 | 29100.24101 | 125217.515  | 452075.296  | 179199.1335 | 189935.0657 |
| 80 | p-Coumaric acid methyl ester                                | C10H10O3   | Phenolic acids        | Phenolic acids   | 19367-38-5  | 177.06 | 145.03 | 178.063  | [M-H] <sup>-</sup> | 82370.73427 | 91256.35214 | 68274.9224  | 154604.628  | 137868.4644 | 162926.4255 | 243090.9207 | 269990.5825 | 287048.618  |
| 81 | 1-O-Galloyl-6-O-p-Coumaroyl-β-D-glucose                     | C22H22O12  | Phenolic acids        | Phenolic acids   | -           | 477.1  | 169.01 | 478.1111 | [M-H] <sup>-</sup> | 198633.9054 | 221204.0623 | 153837.7465 | 189196.1395 | 160824.2538 | 185355.8688 | 225691.1897 | 200547.0486 | 307428.556  |
| 82 | Apigenin-5-O-glucoside                                      | C21H20O10  | Flavonoids            | Flavones         | 28757-27-9  | 433.11 | 271.06 | 432.1056 | [M+H] <sup>+</sup> | 142250.6571 | 205073.5951 | 121645.7745 | 193535.3299 | 187499.3006 | 156103.74   | 312343.7417 | 244391.2488 | 235727.3679 |

|     |                                                            |            |                |                |             |          |          |             |        |             |             |             |             |             |             |             |             |             |
|-----|------------------------------------------------------------|------------|----------------|----------------|-------------|----------|----------|-------------|--------|-------------|-------------|-------------|-------------|-------------|-------------|-------------|-------------|-------------|
| 83  | 2,6-dimethoxy-hydroquinone-4-O-β-D-glucopyranoside         | C14H20O9   | Phenolic acids | Phenolic acids | -           | 331.1    | 169.01   | 332.1107    | [M-H]- | 223545.8849 | 241042.1897 | 219062.2728 | 214669.5638 | 225094.1755 | 233459.6297 | 264850.7496 | 259350.1671 | 257990.2316 |
| 84  | 4,6-(S)-Hexahydroxydiphenyl-β-D-glucose                    | C20H18O14  | Phenolic acids | Phenolic acids | 36378-48-0  | 481.06   | 301      | 482.0697    | [M-H]- | 293089.1861 | 239349.2906 | 245331.8987 | 228786.8634 | 233872.5623 | 204473.9781 | 269837.7081 | 250902.1162 | 237347.809  |
| 85  | Myricetin-3-O-galactoside*                                 | C21H20O13  | Flavonoids     | Flavonols      | 15648-86-9  | 481.1    | 319.06   | 480.0904    | [M+H]+ | 56549.4511  | 83095.09379 | 59535.1425  | 101139.214  | 74857.95554 | 149763.9929 | 193494.2519 | 219157.7166 | 338783.0247 |
| 86  | 2-Hydroxybenzaldehyde (Salicylaldehyde)                    | C7H6O2     | Phenolic acids | Phenolic acids | 90-02-8     | 121.03   | 77.04    | 122.0368    | [M-H]- | 2764194.206 | 436514.427  | 439629.6853 | 345807.1653 | 1071184.918 | 1123139.584 | 299817.5612 | 218150.9187 | 224687.6424 |
| 87  | Brevifolin carboxylic acid                                 | C13H8O8    | Phenolic acids | Phenolic acids | 18490-95-4  | 291.01   | 247.02   | 292.0219    | [M-H]- | 256936.9628 | 243751.9517 | 271571.7682 | 203855.541  | 236154.0545 | 206609.075  | 246284.3256 | 224261.5162 | 268190.2266 |
| 88  | Apigenin-6,8-di-C-glucoside (Vicenin-2)                    | C27H30O15  | Flavonoids     | Flavones       | 23666-13-9  | 595.17   | 457.13   | 594.1585    | [M+H]+ | 207100.2211 | 209770.5791 | 213172.595  | 177385.0922 | 174279.6529 | 235012.1927 | 223153.9738 | 220554.1009 | 240129.3974 |
| 89  | 1,6-Di-O-galloyl-β-D-glucose                               | C20H20O14  | Phenolic acids | Phenolic acids | -           | 483.08   | 169.01   | 484.0853    | [M-H]- | 109686.4641 | 116668.7755 | 118412.8744 | 119600.2142 | 118909.685  | 28966.36509 | 218814.7638 | 215353.2731 | 249063.1014 |
| 90  | 3-Aminosalicylic acid                                      | C7H7NO3    | Phenolic acids | Phenolic acids | 570-23-0    | 152.04   | 108.05   | 153.0426    | [M-H]- | 200063.9653 | 201924.5862 | 192330.2225 | 204845.3521 | 209217.0688 | 213041.04   | 227517.9026 | 215555.455  | 235440.4584 |
| 91  | 3-(4-Hydroxyphenyl)-propionic acid*                        | C9H10O3    | Phenolic acids | Phenolic acids | 501-97-3    | 165.06   | 119.05   | 166.063     | [M-H]- | 207570.1215 | 191151.987  | 208831.0221 | 186963.5646 | 196047.5343 | 202911.3131 | 221865.1895 | 233090.5712 | 212983.7107 |
| 92  | Quercetin-7-O-rutinoside*                                  | C27H30O16  | Flavonoids     | Flavonols      | 147714-62-3 | 611.1607 | 303.0499 | 610.1534    | [M+H]+ | 91716.04376 | 85653.28401 | 81972.69814 | 137539.1518 | 91566.72582 | 128019.2857 | 196899.2404 | 243087.2175 | 213331.4455 |
| 93  | Quercetagenin-7-O-glucoside(Quercetagenin)*                | C21H20O13  | Flavonoids     | Flavonols      | 548-75-4    | 481.1    | 319.05   | 480.0904    | [M+H]+ | 131275.1001 | 105591.3888 | 67338.11932 | 132081.4376 | 156735.3262 | 154318.7663 | 199203.4686 | 202883.4561 | 248545.4273 |
| 94  | Vanillic acid                                              | C8H8O4     | Phenolic acids | Phenolic acids | 121-34-6    | 167.03   | 108.02   | 168.0423    | [M-H]- | 188089.9738 | 180719.8586 | 190538.5676 | 122400.8616 | 145836.4029 | 127783.5854 | 195607.1284 | 218961.691  | 220248.67   |
| 95  | Apigenin-8-C-Arabinoside                                   | C20H18O9   | Flavonoids     | Flavones       | -           | 403.1    | 367.08   | 402.0951    | [M+H]+ | 166592.7818 | 132214.4983 | 85536.64409 | 157509.2632 | 137931.9831 | 61446.81692 | 152884.8764 | 278600.49   | 193832.6254 |
| 96  | Galangin-7-O-glucoside*                                    | C21H20O10  | Flavonoids     | Flavones       | -           | 433.11   | 271.06   | 432.1056    | [M+H]+ | 171821.2299 | 140057.6922 | 110986.6119 | 174601.9439 | 111519.9533 | 180409.4204 | 227286.3111 | 180786.0364 | 211064.5931 |
| 97  | Apigenin-8-C-(2"-glucosyl)arabinoside                      | C26H28O14  | Flavonoids     | Flavones       | -           | 565.16   | 457.11   | 564.1479    | [M+H]+ | 213559.5527 | 145149.0975 | 143954.609  | 179008.2546 | 137104.8514 | 141929.5438 | 211773.3682 | 210031.9382 | 162093.227  |
| 98  | Eriodictyol-3'-O-glucoside*                                | C21H22O11  | Flavonoids     | Flavanones     | -           | 449.11   | 287.06   | 450.1162    | [M-H]- | 69223.56142 | 99956.41938 | 116992.6386 | 127147.955  | 104770.6046 | 105182.9686 | 188511.8077 | 176912.5361 | 216914.1823 |
| 99  | 3',5',5',7-Tetrahydroxy-4"-methoxyflavanone-3'-O-glucoside | C22H24O12  | Flavonoids     | Flavones       | -           | 481.13   | 319.05   | 480.1268    | [M+H]+ | 114247.1644 | 53326.8325  | 46812.56103 | 134634.8804 | 91223.30848 | 132293.5282 | 193731.2414 | 159080.0792 | 228011.9606 |
| 100 | Protocatechuic aldehyde                                    | C7H6O3     | Phenolic acids | Phenolic acids | 139-85-5    | 139.04   | 65.04    | 138.0317    | [M+H]+ | 200642.8561 | 211684.7549 | 169493.1928 | 212249.136  | 191191.7143 | 209884.9226 | 155305.5601 | 200143.7822 | 182849.4645 |
| 101 | Methyl-3-(3-hydroxyphenyl)Propionate                       | C10H12O3   | Phenolic acids | Phenolic acids | 61389-68-2  | 181.09   | 121.06   | 180.0786    | [M+H]+ | 252726.4354 | 188618.9764 | 251663.4774 | 228240.235  | 257738.9632 | 263260.0794 | 195366.3801 | 153803.6919 | 187914.0326 |
| 102 | 2,6-Dimethoxybenzaldehyde*                                 | C9H10O3    | Phenolic acids | Phenolic acids | 3392-97-0   | 165.06   | 119.05   | 166.063     | [M-H]- | 146685.7232 | 151785.4388 | 152634.2869 | 136907.4456 | 171535.031  | 140465.6892 | 161593.2698 | 165485.7676 | 197264.4549 |
| 103 | 7-Hydroxyflavanone                                         | C15H12O3   | Flavonoids     | Flavanones     | 6515-36-2   | 239.07   | 207.04   | 240.0786443 | [M-H]- | 300403.3827 | 87211.52573 | 78277.49135 | 115661.6468 | 78907.12838 | 88319.38    | 106834.877  | 131268.2094 | 273073.0255 |
| 104 | 2,3-Di-O-Galloyl-β-D-Glucose*                              | C20H20O14  | Phenolic acids | Phenolic acids | -           | 483.08   | 169.01   | 484.0853    | [M-H]- | 149092.4763 | 113137.2006 | 112015.8449 | 109134.5409 | 108509.5428 | 95634.59148 | 191148.5256 | 158249.3921 | 156771.234  |
| 105 | Salicylic acid                                             | C7H6O3     | Phenolic acids | Phenolic acids | 69-72-7     | 137.03   | 108.02   | 138.0317    | [M-H]- | 123418.5334 | 147573.1184 | 150087.117  | 142132.5439 | 137124.8333 | 142480.432  | 156885.8493 | 145888.0558 | 190007.671  |
| 106 | β-Hydroxy-(3,4-dihydroxyphenylethanol)-glucoside           | C14H20O9   | Phenolic acids | Phenolic acids | -           | 331.1    | 151.04   | 332.111     | [M-H]- | 134299.5844 | 147654.422  | 143817.8821 | 148102.9062 | 151709.7227 | 148645.5717 | 159458.6082 | 158840.6036 | 172518.0449 |
| 107 | Syringin                                                   | C17H24O9   | Phenolic acids | Phenolic acids | 118-34-3    | 371.13   | 209.08   | 372.142     | [M-H]- | 26181.1108  | 39617.50729 | 34101.98869 | 44592.31896 | 46416.41768 | 48345.9109  | 146821.55   | 159697.2409 | 164291.0794 |
| 108 | kaempferol-3-p-coumaroyldiglucoiside                       | C36H36O18  | Flavonoids     | Flavonols      | -           | 755.19   | 285.04   | 756.1902    | [M-H]- | 117268.5222 | 105668.4943 | 100560.4872 | 138508.3217 | 114224.6662 | 117403.2052 | 148034.4298 | 157017.8013 | 158452.8929 |
| 109 | Ethyl phenylacetate                                        | C10H12O2   | Phenolic acids | Phenolic acids | 101-97-3    | 165.09   | 91.05    | 164.0837    | [M+H]+ | 102001.4156 | 141400.5365 | 92317.02888 | 74464.06481 | 85407.26482 | 122546.077  | 145673.8568 | 109817.5243 | 202893.7122 |
| 110 | Quercetin-3-O-arabinoside                                  | C20H18O11  | Flavonoids     | Flavonols      | 22255-13-6  | 433.08   | 300.03   | 434.0849    | [M-H]- | 3838.162701 | 17635.64785 | 9095.331049 | 34482.56256 | 26288.49176 | 34445.9846  | 136090.3168 | 121103.935  | 198967.0165 |
| 111 | Delphinidin-3-O-galactoside                                | C21H21O12+ | Flavonoids     | Anthocyanidins | 28500-00-7  | 465.1    | 303.05   | 465.1028    | [M]+   | 97899.52411 | 97108.48518 | 78717.03576 | 101695.2139 | 113309.681  | 107411.8622 | 136035.243  | 134774.7583 | 140515.8389 |
| 112 | Hispidulin-7-O-glucoside(Homoplantagin)*                   | C22H22O11  | Flavonoids     | Flavones       | 17680-84-1  | 463.13   | 301.09   | 462.1162    | [M+H]+ | 74284.02947 | 28251.39652 | 53761.23333 | 59559.9335  | 53436.74239 | 58319.06904 | 111456.9641 | 122348.5945 | 157087.6327 |
| 113 | Diomietin-7-O-glucoside*                                   | C22H22O11  | Flavonoids     | Flavones       | 20126-59-4  | 463.12   | 301.07   | 462.1162    | [M+H]+ | 52274.89487 | 39769.07955 | 48970.16663 | 70394.6035  | 59101.49483 | 77905.32993 | 95491.35827 | 121108.1469 | 162059.0189 |
| 114 | Diomietin-7-O-galactoside*                                 | C22H22O11  | Flavonoids     | Flavones       | -           | 463.12   | 301.07   | 462.1162    | [M+H]+ | 52274.89487 | 39769.07955 | 48970.16663 | 70394.6035  | 59101.49483 | 77905.32993 | 95491.35827 | 121108.1469 | 162059.0189 |
| 115 | Diaceffoylschikimic acid                                   | C25H22O11  | Phenolic acids | Phenolic acids | -           | 499.13   | 163.04   | 498.1162    | [M+H]+ | 71277.42491 | 66283.26115 | 63204.84292 | 69115.97055 | 85694.78324 | 99952.35326 | 111580.3078 | 115122.5286 | 145803.8756 |
| 116 | Syringaldehyde; 4-Hydroxy-3,5-Dimethoxybenzaldehyde        | C9H10O4    | Phenolic acids | Phenolic acids | 134-96-3    | 181.05   | 151      | 182.0579    | [M-H]- | 402237.8729 | 414834.8216 | 426257.5179 | 149769.6254 | 129218.2732 | 131697.4828 | 129340.9739 | 126155.3234 | 116874.2106 |
| 117 | 4-Hydroxyphenylacetic Acid*                                | C9H10O4    | Phenolic acids | Phenolic acids | 306-23-0    | 181.05   | 135.04   | 182.0579    | [M-H]- | 79294.52252 | 77103.61791 | 80490.51115 | 67591.72372 | 86282.34988 | 88390.16425 | 113052.0085 | 120304.5764 | 123481.1564 |
| 118 | Luteolin-6-C-glucoside (Isoorientin)*                      | C21H20O11  | Flavonoids     | Flavones       | 4261-42-1   | 447.09   | 357.06   | 448.1006    | [M-H]- | 69377.47013 | 65111.5094  | 49727.03058 | 88072.9878  | 70554.73611 | 88068.68164 | 112204.0526 | 119074.8383 | 118337.5463 |
| 119 | 3-hydroxyphenylacetic acid*                                | C8H8O3     | Phenolic acids | Phenolic acids | 621-37-4    | 151.04   | 107.05   | 152.0473    | [M-H]- | 85988.93202 | 96179.1872  | 83606.0734  | 91559.77984 | 93239.23229 | 77221.06252 | 101953.4277 | 110374.9614 | 128263.9813 |
| 120 | Methyl 2,4-dihydroxyphenylacetate*                         | C9H10O4    | Phenolic acids | Phenolic acids | 67828-42-6  | 181.05   | 135.04   | 182.0579    | [M-H]- | 71700.1836  | 69461.34    | 72721.56919 | 68251.64276 | 68696.79935 | 69002.80203 | 106171.1083 | 102100.2763 | 123815.8068 |
| 121 | Hydroxyferulic acid glucoside                              | C16H20O10  | Phenolic acids | Phenolic acids | -           | 371.1    | 209.05   | 372.1056    | [M-H]- | 21622.57325 | 17285.54888 | 24205.43922 | 31185.88604 | 35143.38544 | 28442.72397 | 78494.2591  | 101771.5555 | 105003.7883 |
| 122 | Protocatechuic Acid Methyl Ester                           | C8H8O4     | Phenolic acids | Phenolic acids | 2150-43-8   | 167.04   | 108.02   | 168.0423    | [M-H]- | 36598.67629 | 40338.03776 | 38246.96609 | 55487.97392 | 52184.53665 | 60647.30024 | 91005.40906 | 97446.94941 | 91950.56571 |
| 123 | Isovitexin-8-O-xyloside                                    | C26H28O14  | Flavonoids     | Flavones       | -           | 565.16   | 367.1    | 564.1479    | [M+H]+ | 73595.84296 | 71995.86896 | 67995.26767 | 62900.89938 | 64095.42416 | 82123.57564 | 81603.18282 | 92553.88736 | 98964.82973 |
| 124 | 2-(3,4-dihydroxyphenyl)ethanediol 1-O-β-D-glucopyranoside* | C14H20O9   | Phenolic acids | Phenolic acids | -           | 331.1    | 153.02   | 332.1107    | [M-H]- | 64701.78319 | 56496.476   | 67708.80036 | 63067.31069 | 56462.8977  | 69003.1084  | 90902.88918 | 92039.25469 | 84880.50111 |

|     |                                                                   |           |                       |                   |             |          |          |             |                    |             |             |             |             |             |             |             |             |             |
|-----|-------------------------------------------------------------------|-----------|-----------------------|-------------------|-------------|----------|----------|-------------|--------------------|-------------|-------------|-------------|-------------|-------------|-------------|-------------|-------------|-------------|
| 125 | Catechin gallate*                                                 | C22H18O10 | Flavonoids            | Flavanols         | 130405-40-2 | 443.1    | 139.04   | 442.09      | [M+H] <sup>+</sup> | 30559.19797 | 35595.79722 | 56399.38133 | 21572.68009 | 77363.55318 | 50919.78792 | 67238.574   | 80449.95333 | 118719.0185 |
| 126 | Tachioside*                                                       | C13H18O8  | Phenolic acids        | Phenolic acids    | 109194-60-7 | 301.09   | 123.01   | 302.1002    | [M-H] <sup>-</sup> | 100533.5501 | 104298.4695 | 97381.28165 | 87164.90323 | 102806.2775 | 103616.1074 | 89239.60007 | 89207.75714 | 85928.54222 |
| 127 | 1-O-p-Coumaroyl-β-D-glucose*                                      | C15H18O8  | Phenolic acids        | Phenolic acids    | 7139-64-2   | 325.09   | 163.04   | 326.1002    | [M-H] <sup>-</sup> | 171136.5796 | 187270.5464 | 185622.8412 | 63895.76038 | 162287.2176 | 220614.1349 | 95816.98252 | 75298.02979 | 83094.58783 |
| 128 | p-Coumaric acid-4-O-glucoside*                                    | C15H18O8  | Phenolic acids        | Phenolic acids    | 117405-48-8 | 325.09   | 163.04   | 326.1002    | [M-H] <sup>-</sup> | 171136.5796 | 187270.5464 | 185622.8412 | 63895.76038 | 162287.2176 | 220614.1349 | 95816.98252 | 75298.02979 | 83094.58783 |
| 129 | Chrysoeriol-7-O-rutinoside                                        | C28H32O15 | Flavonoids            | Flavones          | -           | 607.17   | 299      | 608.1741    | [M-H] <sup>-</sup> | 41223.01035 | 44567.6314  | 39992.08651 | 59658.09902 | 52114.7574  | 56040.93613 | 86453.45288 | 71329.26469 | 81526.51645 |
| 130 | Furanofructosyl-α-D-(6-mustard acyl)glucoside*                    | C23H32O15 | Phenolic acids        | Phenolic acids    | -           | 547.17   | 223.1    | 548.1741    | [M-H] <sup>-</sup> | 19805.81321 | 25638.90808 | 26627.40115 | 60548.6177  | 59312.20228 | 62004.26918 | 65787.25128 | 60338.09821 | 95464.18308 |
| 131 | Homovanilloylquinic acid                                          | C16H20O9  | Phenolic acids        | Phenolic acids    | -           | 355.1    | 121.03   | 356.1107    | [M-H] <sup>-</sup> | 81097.96537 | 75015.94721 | 76700.01297 | 82707.78436 | 77907.414   | 87779.02312 | 72693.80724 | 74642.12144 | 73535.78307 |
| 132 | 4-Hydroxycoumarin                                                 | C9H6O3    | Lignans and Coumarins | Coumarins         | 1076-38-6   | 161.02   | 117.03   | 162.0317    | [M-H] <sup>-</sup> | 59594.67389 | 52766.47403 | 49260.99323 | 51125.9417  | 60487.1076  | 64637.29611 | 67608.30627 | 78079.70522 | 74298.47257 |
| 133 | (S)-2-Hydroxy-3-(4-Hydroxyphenyl)Propanoic Acid                   | C9H10O4   | Phenolic acids        | Phenolic acids    | 23508-35-2  | 181.05   | 135.04   | 182.0579    | [M-H] <sup>-</sup> | 48417.66378 | 50927.54805 | 38499.15897 | 45126.60674 | 47274.73027 | 43434.72103 | 73035.33603 | 67432.73222 | 77030.56523 |
| 134 | 2-Galloyl-6-O-Benzoyl Glucose*                                    | C20H20O11 | Phenolic acids        | Phenolic acids    | -           | 435.09   | 169.01   | 436.1006    | [M-H] <sup>-</sup> | 80510.64933 | 40058.07051 | 39817.5775  | 54822.46297 | 44079.61558 | 54931.83537 | 61206.02416 | 65625.23147 | 85004.36991 |
| 135 | 6-O-Sinapoylsucrose*                                              | C23H32O15 | Phenolic acids        | Phenolic acids    | -           | 547.17   | 223.06   | 548.1741    | [M-H] <sup>-</sup> | 32635.52799 | 26572.03669 | 33755.86831 | 68595.21307 | 71042.921   | 67245.73933 | 58601.83773 | 76037.22777 | 76128.57744 |
| 136 | 3-O-Methyl-epicatechin                                            | C16H16O6  | Flavonoids            | Flavanols         | 76549-34-3  | 305.1    | 139.04   | 304.0947    | [M+H] <sup>+</sup> | 47985.74287 | 51938.08143 | 49093.5358  | 49277.80924 | 38046.36066 | 38105.728   | 71690.59568 | 73930.84509 | 61142.41552 |
| 137 | Isolaricresinol-9-O-glucoside*                                    | C26H34O11 | Lignans and Coumarins | Lignans           | 63358-12-3  | 521.2    | 359.15   | 522.2101    | [M-H] <sup>-</sup> | 66742.11353 | 54634.40182 | 66657.66032 | 64453.83573 | 67918.04125 | 69004.06075 | 62295.52044 | 62155.67737 | 62001.6495  |
| 138 | Procyanidin B1*                                                   | C30H26O12 | Tannins               | Proanthocyanidins | 20315-25-7  | 577.14   | 425.09   | 578.1424    | [M-H] <sup>-</sup> | 86689.69587 | 70753.03907 | 74523.5745  | 70469.12282 | 71321.41448 | 76719.33742 | 53583.18597 | 55881.79317 | 69285.43726 |
| 139 | Phenylpropionic acid-O-β-D-glucopyranoside                        | C15H18O8  | Phenolic acids        | Phenolic acids    | -           | 325.09   | 119.05   | 326.1002    | [M-H] <sup>-</sup> | 85413.83125 | 85792.38969 | 77704.10475 | 80352.66641 | 76886.28754 | 74262.7137  | 67833.7657  | 46189.68135 | 62057.50858 |
| 140 | Tyrosol; 4-Hydroxyphenylethanol                                   | C8H10O2   | Phenolic acids        | Phenolic acids    | 501-94-0    | 139.08   | 55.02    | 138.0681    | [M+H] <sup>+</sup> | 40712.94514 | 36194.51924 | 48488.25881 | 35184.17009 | 21606.36089 | 38887.66217 | 50912.60109 | 47870.28664 | 75926.2803  |
| 141 | 3',5',5',7'-Tetrahydroxyflavanone-7-O-glucoside*                  | C21H22O11 | Flavonoids            | Flavanones        | -           | 451.12   | 289.07   | 450.1162    | [M+H] <sup>+</sup> | 78069.42997 | 60969.10401 | 75578.93932 | 99712.76366 | 60306.0001  | 78026.5229  | 47894.48176 | 52302.05936 | 74217.1196  |
| 142 | 2-hydroxymethyl benzoic acid                                      | C8H8O3    | Phenolic acids        | Phenolic acids    | 612-20-4    | 151.04   | 77.04    | 152.0473    | [M-H] <sup>-</sup> | 38733.06339 | 37685.3384  | 39137.56    | 41770.29447 | 42301.82597 | 42839.8752  | 68827.08824 | 52479.94801 | 52598.24199 |
| 143 | 6-O-Feruloyl-D-sucrose                                            | C22H30O14 | Phenolic acids        | Phenolic acids    | 118230-77-6 | 517.16   | 175.04   | 518.1636    | [M-H] <sup>-</sup> | 130516.9075 | 101534.547  | 111348.0127 | 76860.27395 | 67249.36854 | 75092.97687 | 54266.135   | 58504.07897 | 54435.80588 |
| 144 | Hydroxytyrosol                                                    | C8H10O3   | Phenolic acids        | Phenolic acids    | 10597-60-1  | 153.06   | 123.05   | 154.063     | [M-H] <sup>-</sup> | 32896.49308 | 27563.49994 | 35414.62811 | 31756.64701 | 33560.65084 | 56404.89248 | 53532.24128 | 57392.59145 | 55356.46702 |
| 145 | 7-Methoxy-3-[1-(3-pyrrolyl)methylidene]-4-chromanone              | C16H13NO3 | Flavonoids            | Other Flavonoids  | -           | 268.103  | 136.0607 | 267.0895433 | [M+H] <sup>+</sup> | 15637.53905 | 15567.45031 | 14743.6227  | 25278.36859 | 22253.22671 | 22519.6441  | 60399.64    | 52106.736   | 49885.01752 |
| 146 | 3,4-Dihydro-4-(4'-hydroxyphenyl)-5,7-dihydroxycoumarin glucoside* | C21H22O10 | Lignans and Coumarins | Coumarins         | -           | 435.13   | 273.08   | 434.1208    | [M+H] <sup>+</sup> | 58356.52929 | 60707.80344 | 82184.79067 | 137703.7013 | 74944.86775 | 66869.51515 | 48984.92298 | 52310.78761 | 56328.3826  |
| 147 | Skimmin (7-Hydroxycoumarin-7-O-glucoside)                         | C15H16O8  | Lignans and Coumarins | Coumarins         | 93-39-0     | 325.09   | 163.04   | 324.0845    | [M+H] <sup>+</sup> | 48858.49945 | 60032.72527 | 86980.53731 | 58797.30826 | 64693.20137 | 68121.09831 | 49756.09505 | 57947.35518 | 47188.99473 |
| 148 | Kaempferol-7-O-rhamnoside*                                        | C21H20O10 | Flavonoids            | Flavanols         | 20196-89-8  | 431.1    | 285.04   | 432.1056    | [M-H] <sup>-</sup> | 6200.015834 | 5497.195461 | 5191.730566 | 12616.85725 | 12188.2078  | 19606.73356 | 45087.44125 | 50242.12647 | 59120.06652 |
| 149 | 2-Amino-3-methoxybenzoic acid                                     | C8H9NO3   | Phenolic acids        | Phenolic acids    | 3177-80-8   | 168.06   | 94.06    | 167.0582    | [M+H] <sup>+</sup> | 41358.86875 | 46777.52169 | 48698.75635 | 41157.15028 | 46092.16393 | 43873.86669 | 51270.9869  | 48079.15439 | 52764.81009 |
| 150 | 3-Hydroxy-4-methoxybenzoic acid; Isovanillic Acid                 | C8H8O4    | Phenolic acids        | Phenolic acids    | 645-08-9    | 169.05   | 65.04    | 168.0423    | [M+H] <sup>+</sup> | 26302.97421 | 33552.92303 | 45903.28957 | 14973.40565 | 30487.97036 | 41552.56372 | 43973.27349 | 55330.69949 | 46629.45383 |
| 151 | Kaempferol-3-O-rhamnoside (Afzelin)(Kaempferin)*                  | C21H20O10 | Flavonoids            | Flavanols         | 482-39-3    | 431.1    | 285.04   | 432.1056    | [M-H] <sup>-</sup> | 2064.077162 | 2037.10358  | 5377.799179 | 16352.6692  | 13742.94334 | 14468.61102 | 34165.50058 | 44782.99844 | 61369.06853 |
| 152 | Myricetin-3-(2"-galloyl)rhamnoside                                | C28H24O16 | Flavonoids            | Flavanols         | -           | 617.11   | 471.06   | 616.1064347 | [M+H] <sup>+</sup> | 74262.04936 | 14735.4005  | 11818.3397  | 16586.51195 | 24351.1354  | 16191.36247 | 50563.45848 | 37539.17107 | 37525.01822 |
| 153 | Trans-5-O-(p-Coumaroyl)shikimate                                  | C16H16O7  | Phenolic acids        | Phenolic acids    | -           | 321.1    | 147.04   | 320.0896    | [M+H] <sup>+</sup> | 53421.41567 | 43850.72076 | 64821.44396 | 96675.32125 | 100383.2361 | 65157.67693 | 41871.00931 | 30124.09555 | 50451.01215 |
| 154 | Benzyl-(2"-O-xylosyl)glucoside                                    | C18H26O10 | Phenolic acids        | Phenolic acids    | -           | 401.14   | 269.1    | 402.1526    | [M-H] <sup>-</sup> | 37228.78333 | 37044.61303 | 29357.72716 | 30805.09975 | 32803.48029 | 23077.16633 | 36542.66909 | 33253.3557  | 44544.64545 |
| 155 | 3,4-Digalloylshikimic acid                                        | C21H18O13 | Phenolic acids        | Phenolic acids    | -           | 477.06   | 169.01   | 478.0747    | [M-H] <sup>-</sup> | 43542.93957 | 29308.84041 | 18180.80087 | 66464.68143 | 49753.405   | 68634.99049 | 44064.86476 | 36431.26736 | 31244.184   |
| 156 | 4-Hydroxypropiophenone                                            | C9H10O2   | Phenolic acids        | Phenolic acids    | 70-70-2     | 149.07   | 92.03    | 150.0681    | [M-H] <sup>-</sup> | 41930.66089 | 37876.26633 | 39133.27286 | 36896.55175 | 41325.46206 | 41872.50982 | 37354.58577 | 35673.61506 | 36859.65523 |
| 157 | 3-O-Methyltricetin-7-O-(6"-malonyl)glucoside*                     | C25H24O15 | Flavonoids            | Flavones          | -           | 565.12   | 317.07   | 564.1115    | [M+H] <sup>+</sup> | 164016.0261 | 140763.168  | 239354.5574 | 65283.2     | 136255.6031 | 87391.93543 | 14899.30256 | 47736.43793 | 43012.39466 |
| 158 | Tamarixetin-3-O-(6"-malonyl)glucoside*                            | C25H24O15 | Flavonoids            | Flavanols         | -           | 565.12   | 317.07   | 564.1115    | [M+H] <sup>+</sup> | 164016.0261 | 140763.168  | 239354.5574 | 65283.2     | 136255.6031 | 87391.93543 | 14899.30256 | 47736.43793 | 43012.39466 |
| 159 | 1-O-Caffeoyl-4-O-galloyl-β-D-glucose                              | C22H22O13 | Phenolic acids        | Phenolic acids    | -           | 493.1    | 169.01   | 494.106     | [M-H] <sup>-</sup> | 35351.68628 | 29847.51144 | 28848.80668 | 21547.43476 | 27954.17979 | 19443.23162 | 31058.84726 | 23064.38535 | 43606.7867  |
| 160 | p-Hydroxyphenyl-β-D-allopyranoside*                               | C12H16O7  | Phenolic acids        | Phenolic acids    | -           | 271.08   | 108.02   | 272.0896    | [M-H] <sup>-</sup> | 25611.3018  | 26103.12472 | 26433.03639 | 23189.16193 | 24962.44715 | 23287.53572 | 32027.78987 | 28590.30669 | 30556.70107 |
| 161 | Gambirinin A1                                                     | C30H28O12 | Tannins               | Tannin            | 76250-49-2  | 581.17   | 139.04   | 580.1581    | [M+H] <sup>+</sup> | 9           | 9           | 9           | 9           | 9           | 9           | 34956.77977 | 23536.80727 | 30023.79829 |
| 162 | Apigenin-7-O-neohesperidoside (Rhoifolin)*                        | C27H30O14 | Flavonoids            | Flavones          | 17306-46-6  | 579.17   | 271.06   | 578.1636    | [M+H] <sup>+</sup> | 31089.38516 | 8592.066485 | 15180.63178 | 8467.026928 | 13992.35087 | 19611.04954 | 18641.22668 | 26386.19891 | 41519.29951 |
| 163 | 3-Galloylshikimic acid                                            | C14H14O9  | Phenolic acids        | Phenolic acids    | 110082-91-2 | 325.06   | 93.03    | 326.0638    | [M-H] <sup>-</sup> | 13634.49915 | 18047.96402 | 12519.90925 | 18061.6049  | 18430.07772 | 19379.50877 | 26322.2701  | 31095.72311 | 26108.66957 |
| 164 | Arbutin*                                                          | C12H16O7  | Phenolic acids        | Phenolic acids    | 497-76-7    | 271.08   | 108.02   | 272.0896    | [M-H] <sup>-</sup> | 25312.16811 | 18803.66529 | 24410.58859 | 23433.70592 | 19183.55097 | 23261.68872 | 25108.79647 | 30088.03467 | 27247.46611 |
| 165 | 3-O-p-Coumaroylshikimic acid                                      | C16H16O7  | Phenolic acids        | Phenolic acids    | -           | 319.08   | 145.03   | 320.0896    | [M-H] <sup>-</sup> | 170082.5972 | 154794.4399 | 177883.2782 | 87644.46788 | 95962.34106 | 58961.54806 | 35573.31903 | 22103.83752 | 20459.18982 |
| 166 | Epicatechin-6-C-β-D-glucopyranoside*                              | C21H24O11 | Flavonoids            | Flavanols         | -           | 451.1263 | 289.0729 | 452.1319    | [M-H] <sup>-</sup> | 21396.44752 | 18733.11943 | 19658.51611 | 18794.91034 | 21220.39697 | 18616.23508 | 25366.54006 | 26001.25635 | 23635.15162 |

|     |                                                                                             |           |                       |                  |             |        |        |             |        |             |             |             |             |             |             |             |             |             |
|-----|---------------------------------------------------------------------------------------------|-----------|-----------------------|------------------|-------------|--------|--------|-------------|--------|-------------|-------------|-------------|-------------|-------------|-------------|-------------|-------------|-------------|
| 167 | 3,5-Dihydroxyacetophenone                                                                   | C8H8O3    | Phenolic acids        | Phenolic acids   | 51863-60-6  | 151.04 | 65.04  | 152.0473    | [M-H]- | 24988.04435 | 22796.34668 | 24555.39861 | 24499.66269 | 8682.274697 | 17726.66438 | 17799.31725 | 28068.41968 | 28842.80221 |
| 168 | 5-O-Galloylshikimic acid                                                                    | C14H14O9  | Phenolic acids        | Phenolic acids   | -           | 325.06 | 169.02 | 326.0638    | [M-H]- | 32074.14987 | 33963.86587 | 38902.62981 | 41603.15989 | 35156.90981 | 40393.78776 | 42514.41768 | 7199.84156  | 14315.19964 |
| 169 | catechin-4-β-D-galactopyranoside                                                            | C21H24O11 | Flavonoids            | Flavanols        | -           | 451.12 | 289.07 | 452.1319    | [M-H]- | 18914.9285  | 21202.75968 | 23804.69135 | 13982.57766 | 15858.673   | 16207.00987 | 19690.43582 | 19307.59167 | 21878.86703 |
| 170 | 1-Hydroxypinoresinol-1-O-Glucoside                                                          | C26H32O12 | Lignans and Coumarins | Lignans          | 81495-71-8  | 535.18 | 373.13 | 536.1894    | [M-H]- | 12693.9279  | 15181.14145 | 14686.30675 | 9950.314836 | 10028.93931 | 11729.03846 | 21161.64681 | 14872.95863 | 23426.06466 |
| 171 | 1,3,7-trihydroxy-2-(3,4,5-trihydroxy-6-(hydroxymethyl)oxan-2-yl)xanthen-9-one               | C19H18O10 | Flavonoids            | Other Flavonoids | -           | 405.08 | 243.03 | 406.09      | [M-H]- | 14549.43956 | 17460.10728 | 14728.69003 | 17629.50802 | 16191.89375 | 11363.36085 | 16871.66474 | 23972.25818 | 16700.47431 |
| 172 | 1-O-p-Cumaroylglycerol                                                                      | C12H14O5  | Phenolic acids        | Phenolic acids   | 106055-11-2 | 237.08 | 163.04 | 238.0841    | [M-H]- | 8891.558851 | 9941.643596 | 5830.986642 | 8259.152987 | 15497.25307 | 8438.889993 | 14721.71895 | 17562.65049 | 16799.88516 |
| 173 | Isocorilagin*                                                                               | C27H22O18 | Tannins               | Tannin           | -           | 633.07 | 301    | 634.0806    | [M-H]- | 4255.379068 | 3922.462355 | 3551.18054  | 9879.035385 | 14502.61146 | 8380.65647  | 11952.75542 | 14023.84394 | 17925.14209 |
| 174 | Sanguin H4*                                                                                 | C27H22O18 | Tannins               | Tannin           | 84316-77-8  | 633.08 | 301.01 | 634.0806    | [M-H]- | 5097.257845 | 6220.957644 | 3804.259845 | 22261.6594  | 16545.0294  | 11720.45043 | 11627.55957 | 14629.25675 | 17116.58674 |
| 175 | 3-(3-Hydroxyphenyl)-3-hydroxypropanoic acid                                                 | C9H10O4   | Phenolic acids        | Phenolic acids   | 3247-75-4   | 181.05 | 121.03 | 182.0579    | [M-H]- | 28301.65975 | 30866.01823 | 36936.85763 | 17946.51687 | 13417.78029 | 15960.00784 | 16562.47683 | 9053.816982 | 11896.13514 |
| 176 | Pinocembrin-7-O-neohesperidoside*                                                           | C27H32O13 | Flavonoids            | Flavanones       | 13241-31-1  | 563.18 | 255.07 | 564.1843    | [M-H]- | 8257.812347 | 8287.343137 | 8217.740443 | 1754.764047 | 6762.2251   | 7186.620445 | 8633.99445  | 8967.363563 | 11314.56684 |
| 177 | Secoisolariciresinol-9-O-glucoside                                                          | C26H36O11 | Lignans and Coumarins | Lignans          | 63320-67-2  | 523.22 | 475.2  | 524.2258    | [M-H]- | 11817.54601 | 9936.834648 | 10074.2947  | 15199.42677 | 11552.64467 | 11722.87336 | 10960.23143 | 11128.69669 | 4285.4874   |
| 178 | Gallacetophenone                                                                            | C8H8O4    | Phenolic acids        | Phenolic acids   | 528-21-2    | 169.05 | 65.03  | 168.0423    | [M+H]+ | 9341.412364 | 5125.721072 | 13767.22021 | 9           | 9           | 9           | 8447.295011 | 6859.861217 | 10110.06366 |
| 179 | Leomuride A                                                                                 | C14H20O9  | Phenolic acids        | Phenolic acids   | 121748-12-7 | 331.1  | 108.02 | 332.1107    | [M-H]- | 4088.685726 | 4807.088081 | 3929.989076 | 3593.345636 | 4186.77407  | 4397.67368  | 5706.535768 | 6142.858304 | 4825.747599 |
| 180 | 1-O-Galloyl-2-O-Cinnamoyl-β-D-glucose                                                       | C22H22O11 | Phenolic acids        | Phenolic acids   | 56994-83-3  | 461.11 | 169.01 | 462.1162    | [M-H]- | 4310.652028 | 2766.714683 | 4364.264355 | 9           | 9           | 9           | 4681.536247 | 5491.301636 | 2562.079448 |
| 181 | Kaempferol-6,8-di-C-glucoside                                                               | C27H30O16 | Flavonoids            | Flavanols        | -           | 611.16 | 593.15 | 610.1539    | [M+H]+ | 263774.1703 | 221704.5346 | 99418.10406 | 412537.0645 | 65935.80788 | 140895.93   | 9           | 9           | 9           |
| 182 | 1-hydroxy-7-((2s,3r,4s,5r,6r)-3,4,5-trihydroxy-6-(hydroxymethyl)oxan-2-yl)oxy)xanthen-9-one | C19H18O9  | Flavonoids            | Other Flavonoids | -           | 391.1  | 229.05 | 390.0950823 | [M+H]+ | 100372.1385 | 24482.33553 | 93096.80728 | 80652.95405 | 104218.7748 | 149761.6817 | 9           | 9           | 9           |

\* represents the presence of an isomer of the compound.
