# Supplementary material for: Macronutrient digestion and polyphenol bioaccessibility in oat milk tea products: an in vitro gastrointestinal tract study
Source: Royal Society of Chemistry journal article supplement (doi:10.1039/d4fo01439a), 2024-01-01
Supplement: d4fo01439a4.pdf [file d4fo01439a4.pdf]

**Table. S3. The detail data for VIP value.**

|                          | No. | Compounds                                           | VIP  | Type |
|--------------------------|-----|-----------------------------------------------------|------|------|
| LF-OMTMS-D vs MF-OMTMS-D | 1   | 1-O-Galloyl-2-O-Cinnamoyl-β-D-glucose               | 1.56 | down |
|                          | 2   | 4-Nitrophenol                                       | 1.55 | down |
|                          | 3   | Sinapic acid                                        | 1.55 | up   |
|                          | 4   | Syringaldehyde; 4-Hydroxy-3,5-Dimethoxybenzaldehyde | 1.55 | down |
|                          | 5   | Methyl gallate                                      | 1.55 | up   |
|                          | 6   | 4-O-Methylgallie Acid                               | 1.54 | up   |
|                          | 7   | Sideretin (5,7,8-Trihydroxy-6-methoxycoumarin)      | 1.54 | up   |
|                          | 8   | Kaempferol-7-O-glucoside*                           | 1.53 | up   |
|                          | 9   | Furanofructosyl-α-D-(6-mustard acyl)glucoside*      | 1.53 | up   |
|                          | 10  | 6'-O-Sinapoylsucrose*                               | 1.53 | up   |
|                          | 11  | Quercetin-4'-O-glucoside (Spiraeoside)*             | 1.52 | up   |
|                          | 12  | Chrysoeriol-5-O-glucoside                           | 1.51 | up   |
|                          | 13  | 1-O-Sinapoyl-β-D-glucose                            | 1.51 | up   |
|                          | 14  | Hesperetin-5-O-glucoside                            | 1.49 | up   |
|                          | 15  | Kaempferol-3-O-galactoside (Trifolin)*              | 1.49 | up   |
|                          | 16  | Quercetin-3-O-glucoside (Isoquercitrin)*            | 1.49 | up   |
|                          | 17  | 3-(3-Hydroxyphenyl)-3-hydroxypropanoic acid         | 1.48 | down |
|                          | 18  | Kaempferol-3-O-rhamnoside (Afzelin)(Kaempferin)*    | 1.45 | up   |
|                          | 19  | 3-O-p-Coumaroylshikimic acid                        | 1.45 | down |
|                          | 20  | Quercetin-7-O-glucoside*                            | 1.43 | up   |
| LF-OMTMS-D vs HF-OMTMS-D | 1   | Gambirinin A1                                       | 1.37 | up   |
|                          | 2   | Syringaldehyde; 4-Hydroxy-3,5-Dimethoxybenzaldehyde | 1.37 | down |
|                          | 3   | Protocatechuic Acid Methyl Ester                    | 1.37 | up   |
|                          | 4   | Glucosyringic acid                                  | 1.37 | up   |
|                          | 5   | Kaempferol-7-O-rhamnoside*                          | 1.37 | up   |
|                          | 6   | 4-Nitrophenol                                       | 1.37 | down |
|                          | 7   | Sinapic acid                                        | 1.36 | up   |
|                          | 8   | 4-O-Methylgallie Acid                               | 1.36 | up   |
|                          | 9   | Methyl gallate                                      | 1.36 | up   |
|                          | 10  | 7-Methoxy-3-[1-(3-pyridyl)methylidene]-4-chromanone | 1.36 | up   |
|                          | 11  | Chrysoeriol-5-O-glucoside                           | 1.36 | up   |
|                          | 12  | Kaempferol-7-O-glucoside*                           | 1.36 | up   |
|                          | 13  | Quercetin-7-O-rutinoside*                           | 1.36 | up   |
|                          | 14  | 1-O-Sinapoyl-β-D-glucose                            | 1.36 | up   |
|                          | 15  | 3,4-Methylenedioxy cinnamyl alcohol                 | 1.36 | up   |
|                          | 16  | Quercetin-4'-O-glucoside (Spiraeoside)*             | 1.36 | up   |
|                          | 17  | Syringin                                            | 1.35 | up   |
|                          | 18  | p-Coumaric acid methyl ester                        | 1.35 | up   |
|                          | 19  | Quercetin-3-O-glucoside (Isoquercitrin)*            | 1.35 | up   |
|                          | 20  | Sideretin (5,7,8-Trihydroxy-6-methoxycoumarin)      | 1.35 | up   |

MF-OMTMS-D vs HF-OMTMS-D

|    |                                                                                             |      |      |
|----|---------------------------------------------------------------------------------------------|------|------|
| 1  | Gambirinin A1                                                                               | 1.50 | up   |
| 2  | Gallactophenone                                                                             | 1.50 | up   |
| 3  | 1-hydroxy-7-[[2s,3r,4s,5r,6r]-3,4,5-trihydroxy-6-(hydroxymethyl)oxan-2-yl]oxy}xanthen-9-one | 1.50 | down |
| 4  | Syringin                                                                                    | 1.49 | up   |
| 5  | 1-O-Galloyl-2-O-Cinnamoyl-β-D-glucose                                                       | 1.49 | up   |
| 6  | 7-Methoxy-3-[1-(3-pyridyl)methylidene]-4-chromanone                                         | 1.47 | up   |
| 7  | Hydroxyferulic acid glucoside                                                               | 1.47 | up   |
| 8  | Quercetin-4'-O-glucoside (Spiraeoside)*                                                     | 1.47 | up   |
| 9  | Quercetin-3-O-glucoside (Isoquercitrin)*                                                    | 1.46 | up   |
| 10 | Chrysoeriol-5-O-glucoside                                                                   | 1.46 | up   |
| 11 | Hesperetin-5-O-glucoside                                                                    | 1.46 | up   |
| 12 | Quercetin-3-O-arabinoside                                                                   | 1.46 | up   |
| 13 | Kaempferol-7-O-glucoside*                                                                   | 1.46 | up   |
| 14 | Hispidulin-7-O-glucoside(Homoplantaginin)*                                                  | 1.45 | up   |
| 15 | Kaempferol-7-O-rhamnoside*                                                                  | 1.45 | up   |
| 16 | Apigenin-6-C-arabinoside-8-C-xyloside*                                                      | 1.44 | up   |
| 17 | Apigenin-6,8-di-C-arabinoside*                                                              | 1.44 | up   |
| 18 | Kaempferol-3-O-galactoside (Trifolin)*                                                      | 1.44 | up   |
| 19 | Quercetin-7-O-glucoside*                                                                    | 1.43 | up   |
| 20 | 3-O-p-Coumaroylshikimic acid                                                                | 1.39 | down |

\* represents the presence of an isomer of the compound.
